# Supplementary material
Source: MDPI journal article supplement (https://www.mdpi.com/2304-6740/11/7/293)
Supplement: s1 [file s1 › inorganics-2482616-supplementary.pdf]

## Table of contents:

|                                                                                               |     |
|-----------------------------------------------------------------------------------------------|-----|
| 1. Synthesis and Characterization of 1,3-Diethylbenzimidazol-2-ium salts ( <b>1-3</b> ) ..... | S1  |
| 2. HPLC purity of <b>2</b> , <b>5</b> , <b>7</b> , and <b>9-12</b> .....                      | S2  |
| 3. <sup>1</sup> H NMR Spectra of <b>2</b> and <b>4-12</b> .....                               | S6  |
| 4. <sup>13</sup> C NMR Spectra of <b>2</b> , <b>4-6</b> , and <b>9-12</b> .....               | S11 |
| 5. <sup>195</sup> Pt NMR Spectra of <b>5</b> , <b>6</b> , and <b>9</b> .....                  | S15 |
| 6. ESI-HRMS spectrum of <b>9</b> .....                                                        | S15 |
| 7. X-ray Analysis of <b>1</b> , <b>5</b> , <b>6</b> , <b>8</b> , and <b>10</b> .....          | S16 |
| 7.1. Crystal Structures .....                                                                 | S16 |
| 7.2. Crystallographic Data .....                                                              | S18 |
| 8. Additional HPLC Chromatograms .....                                                        | S25 |
| 8.1. Stability in Organic Solvents .....                                                      | S25 |
| 8.2. Stability in RPMI 1640 cell culture medium (without FCS) .....                           | S28 |
| 8.3. Interactions with Glutathione .....                                                      | S31 |
| 8.4. Interactions with 5'-GMP .....                                                           | S36 |
| 8.5. Interactions with 5'-GMP in the presence of GSH (competitive experiment) .....           | S40 |
| 9. Concentration-Effect Curves of <b>5</b> , <b>7</b> , <b>9</b> , and <b>10-12</b> .....     | S40 |

## 1. Synthesis and Characterization of 1,3-Diethylbenzimidazol-2-ium salts (**1-3**)

### 1,3-Diethylbenzimidazol-2-ium iodide (**1**)

To a stirred solution of benzimidazole 2000 mg (16.93 mmol, 1 equiv.) in 30 mL of anhydrous ACN, 744.9 mg (18.62 mmol, 1.1 equiv.) of NaH was added. After forming the benzimidazole-2-ium sodium salt under the release of H<sub>2</sub>, 20.52 mL (253.90 mmol, 15 equiv.) of iodoethane was applied and the reaction mixture was stirred under an argon atmosphere at 82°C for 72 h in the dark. The solvent was removed under reduced pressure and the residue was taken up in DCM and filtered over celite to remove NaI salt. The solvent was evaporated and the product was recrystallized from EtOH to yield compound **1** as a yellowish solid, 3125 mg (61% yield). <sup>1</sup>H NMR (400 MHz, DMSO-d<sub>6</sub>): δ 9.87 (s, 1H, NCHN), 7.79 – 7.71 (m, 2H, Ar-H), 7.71 – 7.63 (m, 2H, Ar-H), 4.55 (q, *J* = 7.3 Hz, 4H, CH<sub>2</sub>), 1.57 (t, *J* = 7.3 Hz, 6H, CH<sub>3</sub>). <sup>13</sup>C NMR (101 MHz, DMSO-d<sub>6</sub>): δ 142.1 (NCN), 131.4 (Ar-C<sub>q</sub>), 126.93 (Ar-CH), 114.1 (Ar-CH), 42.6 (CH<sub>2</sub>), 14.7 (CH<sub>3</sub>). IR (ATR, cm<sup>-1</sup>): 3025 bw, 2980 bw; 1562 s, 1428 w, 1215 m; 751 s, 552 m.

### 1,3-Diethylbenzimidazol-2-ium chloride (**2**)

2330 mg (7.71 mmol, 1 equiv.) of **1** was dissolved in 30 mL of water. 1202 mg (3.86 mmol, 0.5 equiv.) of Ag<sub>2</sub>SO<sub>4</sub> was added and the resulting yellowish suspension was stirred overnight under light protection. The AgI formed was removed by filtration over celite and the filtrate was supplemented with 803 mg (3.86 mmol, 0.5 equiv.) of BaCl<sub>2</sub>. The solution was stirred for another 2 h, the formed BaSO<sub>4</sub> was removed *via* filtration over celite and the filtrate was evaporated under reduced pressure to dryness. The off-white residue was taken up in DCM and filtered again over celite. Et<sub>2</sub>O was added to the DCM solution to precipitate the product. The latter was collected *via* filtration, washed with Et<sub>2</sub>O, and dried *in vacuo* to yield **2** as a white solid, 1398 mg (86% yield). <sup>1</sup>H NMR (400 MHz, CDCl<sub>3</sub>): δ 11.94 (s, 1H, NCHN), 7.75 – 7.69 (m, 2H, Ar-H), 7.69 – 7.62 (m, 2H, Ar-H), 4.71 (q, *J* = 7.3 Hz, 4H, CH<sub>2</sub>), 1.74 (t, *J* = 7.3 Hz, 6H, CH<sub>3</sub>). <sup>13</sup>C NMR (101 MHz, CDCl<sub>3</sub>): δ 143.3 (NCN), 131.3 (Ar-C<sub>q</sub>), 127.1 (Ar-CH), 113.0 (Ar-CH), 42.88 (CH<sub>2</sub>), 15.0 (CH<sub>3</sub>). ESI-HRMS(+) found (calculated): *m/z* [M-Cl]<sup>+</sup>, 175.1213 (175.1235). IR (ATR, cm<sup>-1</sup>): 3414 bm, 3363 bm; 3031 bw, 2981 bw; 1561 s, 1432 w, 1208 m; 761 s, 514 bm. Purity calculated using HPLC (peak area): 100.0%.

### 1,3-Diethylbenzimidazolium hexafluorophosphate (**3**)

1997 mg (6.61 mmol, 1 equiv.) of **1** was dissolved in 10 mL of MeOH. 10 mL of an aqueous saturated KPF<sub>6</sub> solution was added dropwise to the solution under vigorous stirring. After 2 h of stirring the precipitate formed was filtered, and washed with 10 mL water and Et<sub>2</sub>O, respectively. The product was subsequently dried in high vacuum to yield compound **3** as a white solid, 2000 mg (95% yield). <sup>1</sup>H NMR (400 MHz, DMSO-*d*<sub>6</sub>): δ 9.75 (s, 1H, NCHN), 8.13 – 8.04 (m, 2H, Ar-H), 7.75 – 7.65 (m, 2H, Ar-H), 4.51 (q, *J* = 7.3 Hz, 4H, CH<sub>2</sub>), 1.55 (t, *J* = 7.3 Hz, 6H, CH<sub>3</sub>). <sup>13</sup>C NMR (101 MHz, DMSO-*d*<sub>6</sub>): δ 142.0 (NCN), 131.5 (Ar-C<sub>q</sub>), 127.0 (Ar-CH), 114.1 (Ar-CH), 42.5 (CH<sub>2</sub>), 14.6 (CH<sub>3</sub>). IR (ATR, cm<sup>-1</sup>): 3165 w, 3111 bw, 2985 w; 1568 m, 1432 w 1213 m; 827 bs (ν<sub>P-F</sub>); 754 s, 555 s.

## 2. HPLC purity of **2**, **5**, **7**, and **9-12**

Complexes **2**, **5**, **7**, and **9-12** (approximately 0.5 mg) were dissolved in 0.5 mL of ACN (HPLC-grade) and 20 μL were injected into a Shimadzu prominence HPLC with autosampler SIL-20A HT, column oven CTO-10AS VP, degassers DGU-20A, detector SPD-M20A, and pumps LC-20AD. As column, a KNAUER Eurospher 100-5 C18, 250 x 4 mm was used. For the gold(I) complexes **9-12** gradient elution (70:30 (v/v) to 90:10 (v/v)) of ACN/water (0.1% TFA) was used. While for the platinum(II) complexes **5**, **7**, and **9**, as well as for ligand **2** the gradient was modified as follows: (60:40 (v/v) to 90:10 (v/v)) of ACN/water (0.1% TFA). The software LabSolutions was used for data processing. Purity was calculated using the peak area % at 254 nm.

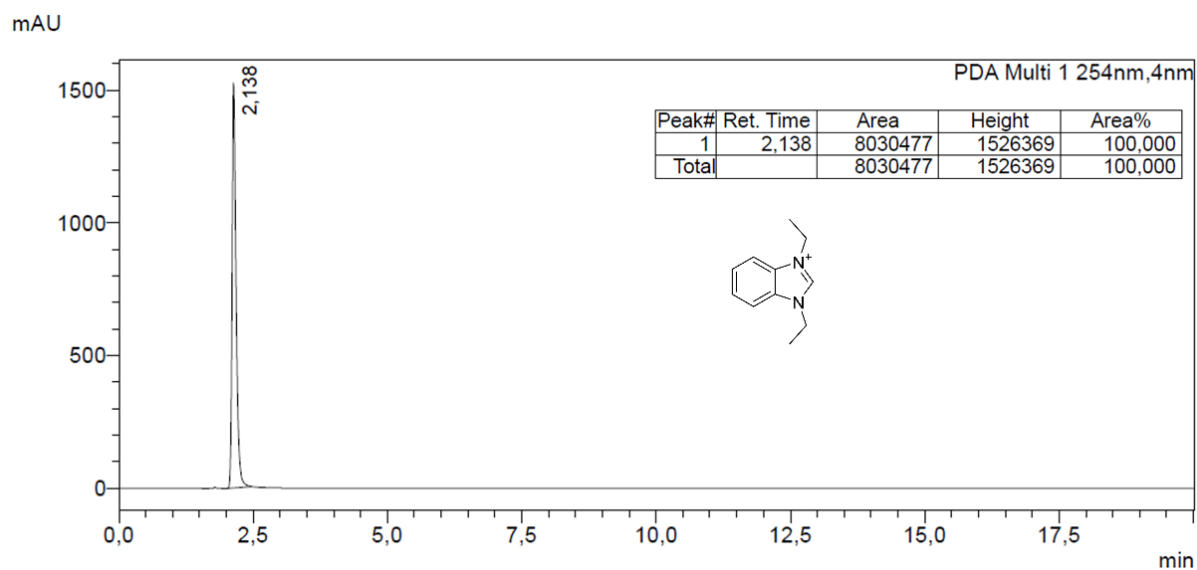

**Figure S1.** HPLC chromatogram of **2** dissolved in ACN (purity: 100.00%).

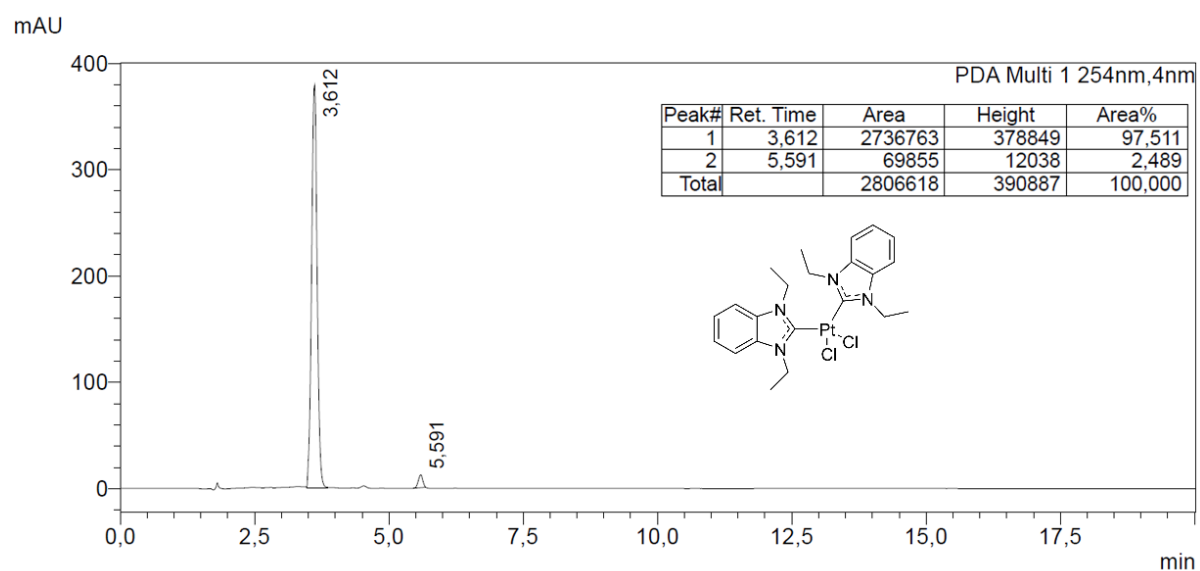

**Figure S2.** HPLC chromatogram of **5** dissolved in ACN (purity: 97.51%).



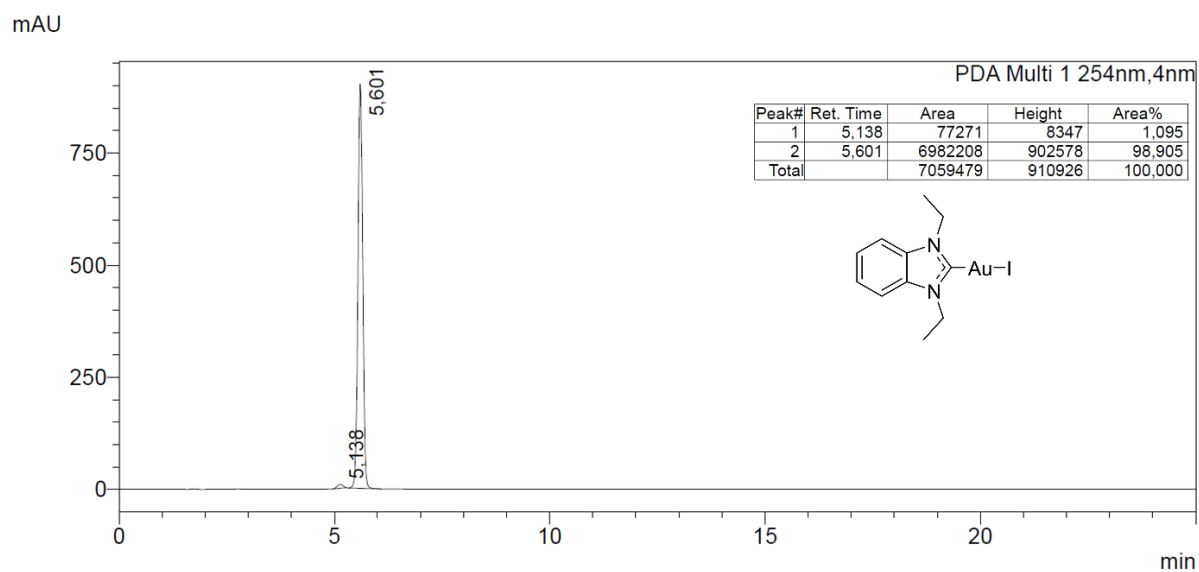

**Figure S6.** HPLC chromatogram of **11** dissolved in ACN (purity: 98.91%).

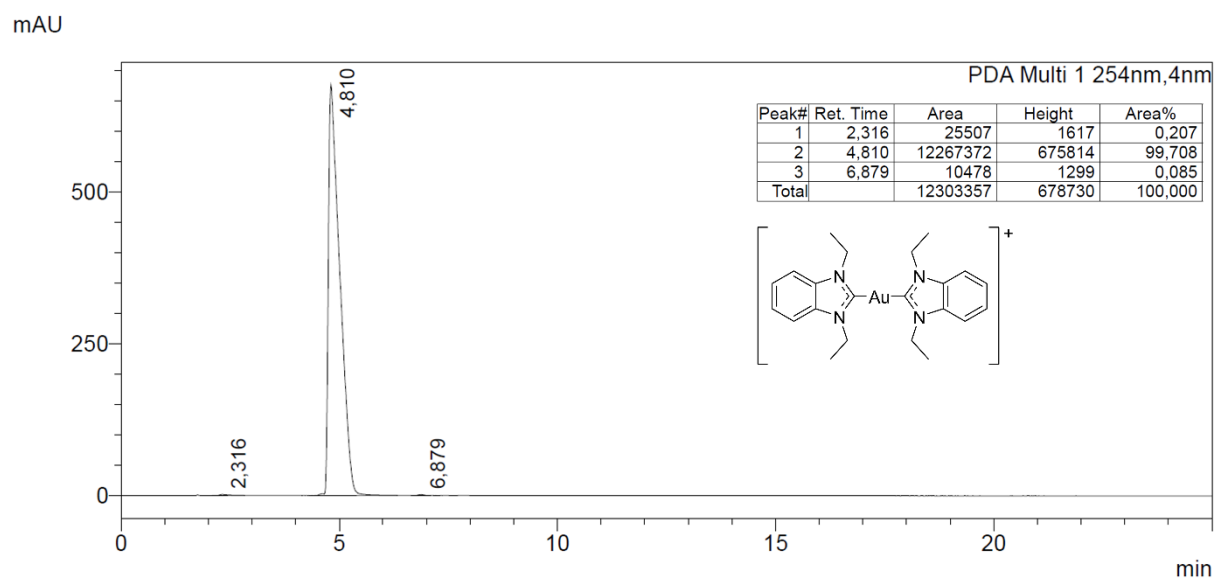

**Figure S7.** HPLC chromatogram of **12** dissolved in ACN (purity: 99.71%).

### 3. $^1\text{H}$ NMR Spectra of **2** and **4-12**

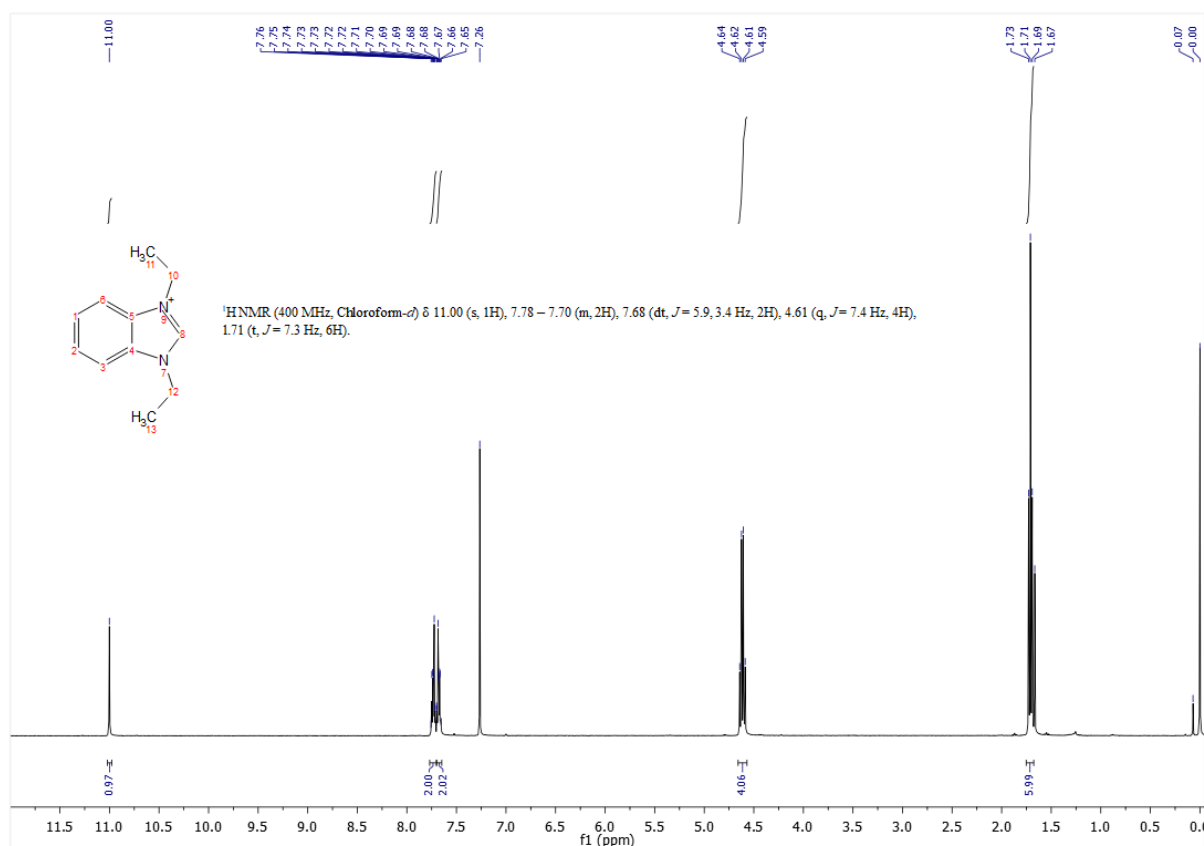

Figure S8.  $^1\text{H}$  NMR spectrum (400 MHz) of **2** recorded in  $\text{CDCl}_3$ .

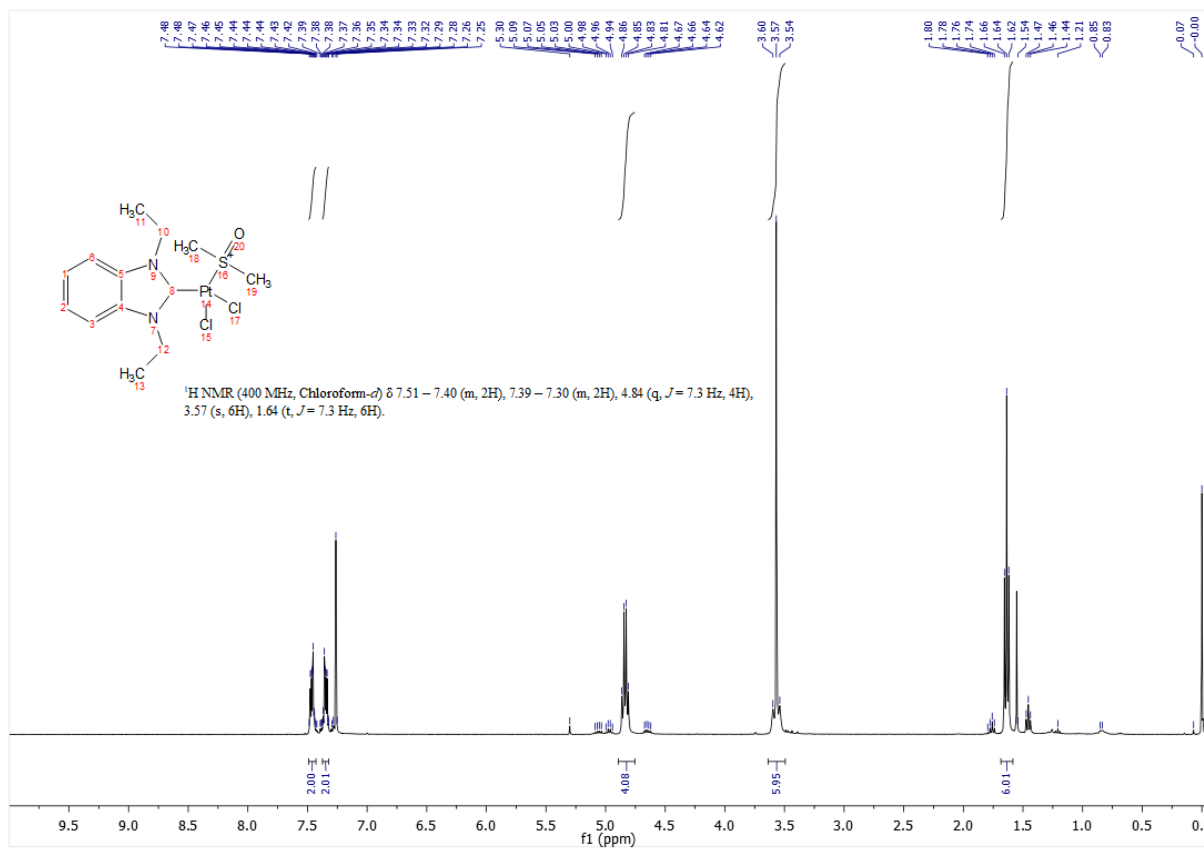

Figure S9.  $^1\text{H}$  NMR spectrum (400 MHz) of **4** recorded in  $\text{CDCl}_3$ .

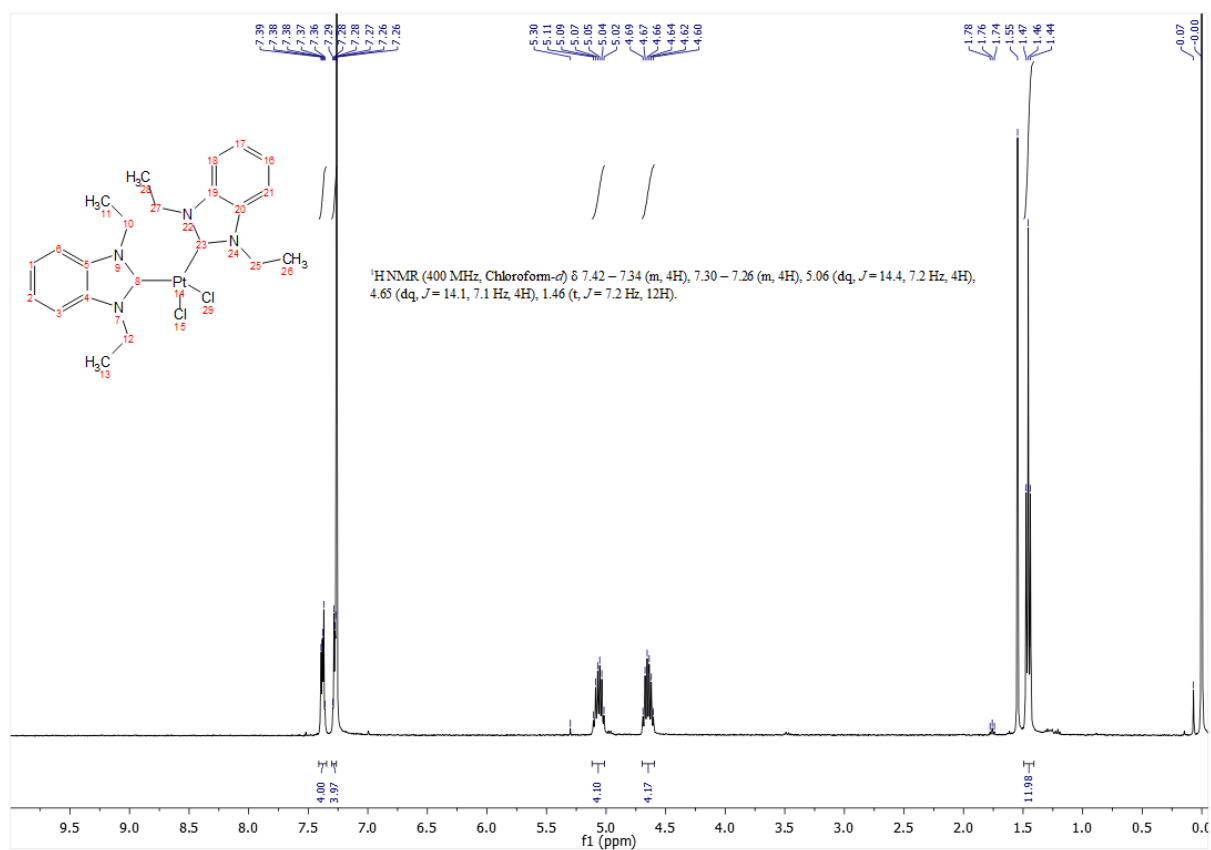

**Figure S10.** <sup>1</sup>H NMR spectrum (400 MHz) of **5** recorded in CDCl<sub>3</sub>.

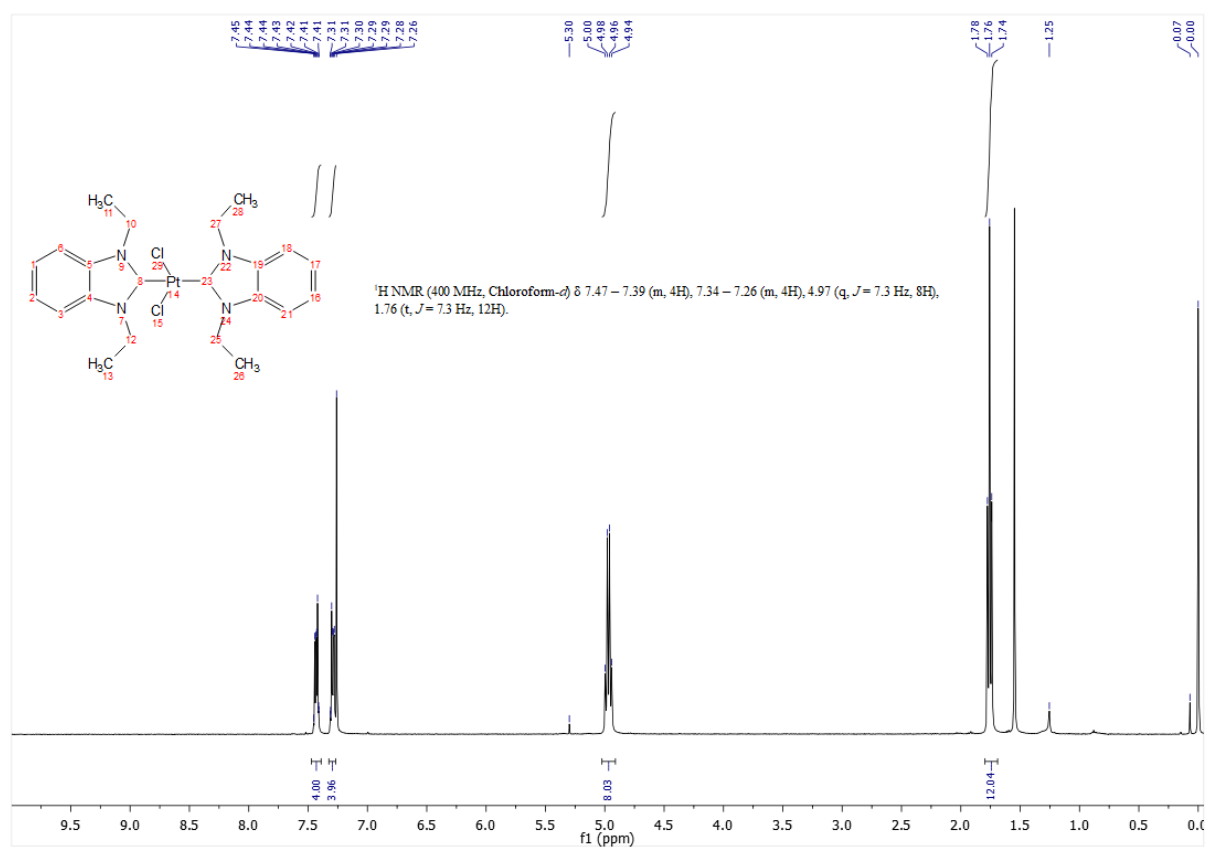

**Figure S11.** <sup>1</sup>H NMR spectrum (400 MHz) of **6** recorded in CDCl<sub>3</sub>.

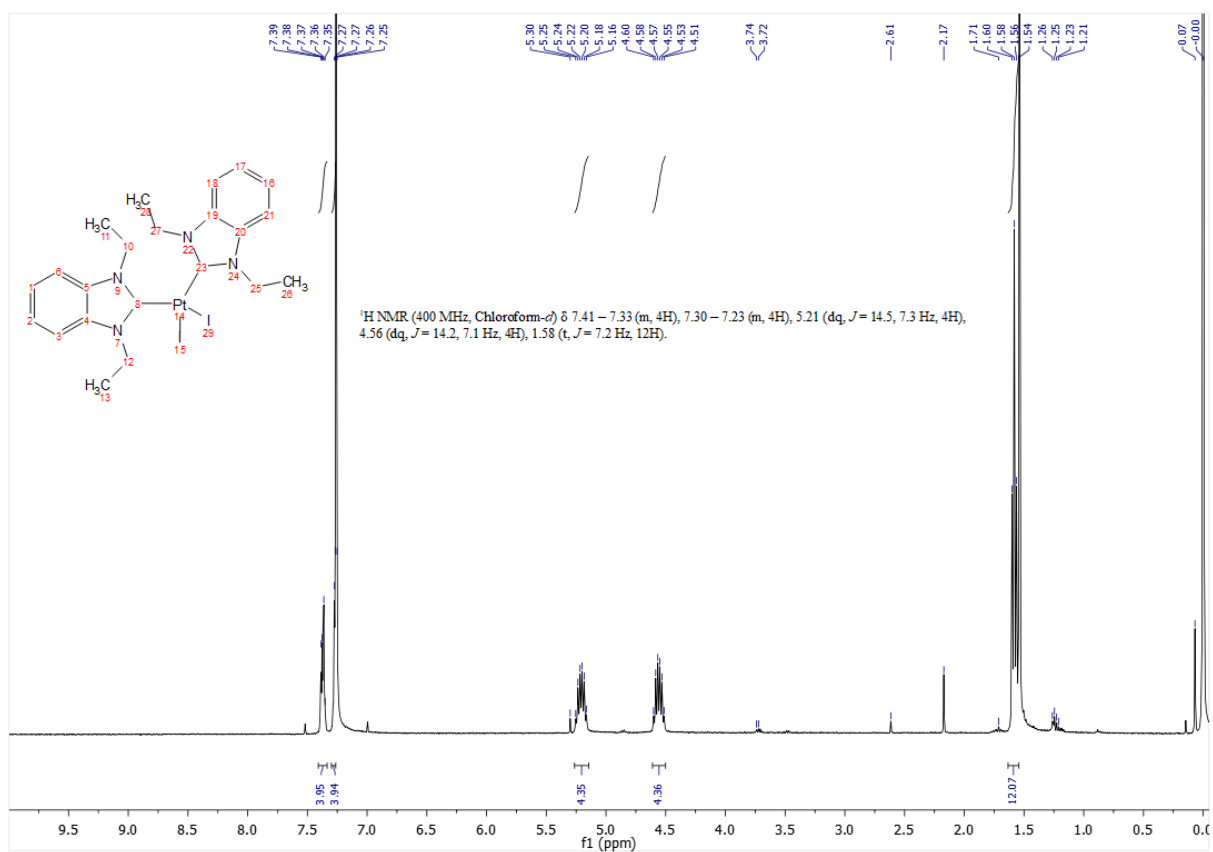

**Figure S12.** <sup>1</sup>H NMR spectrum (400 MHz) of **7** recorded in CDCl<sub>3</sub>.

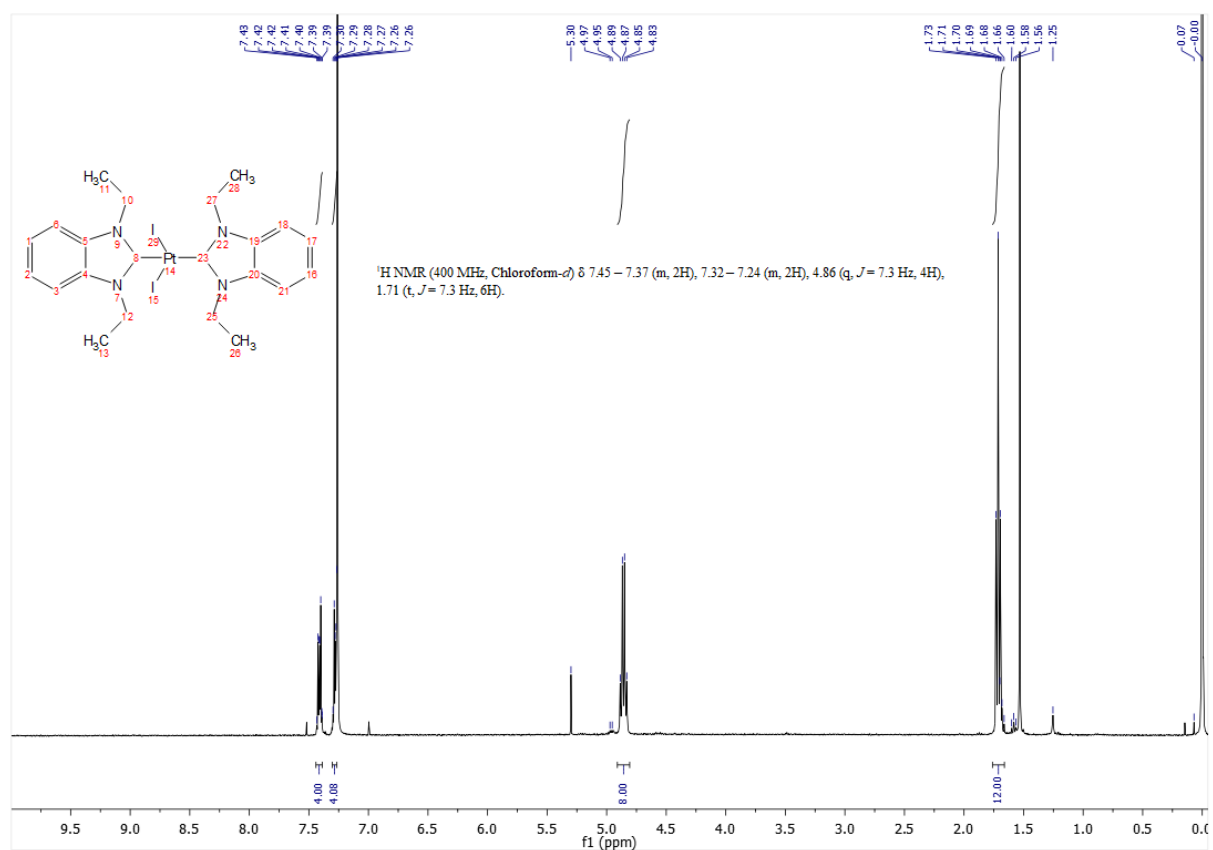

**Figure S13.** <sup>1</sup>H NMR spectrum (400 MHz) of **8** recorded in CDCl<sub>3</sub>.

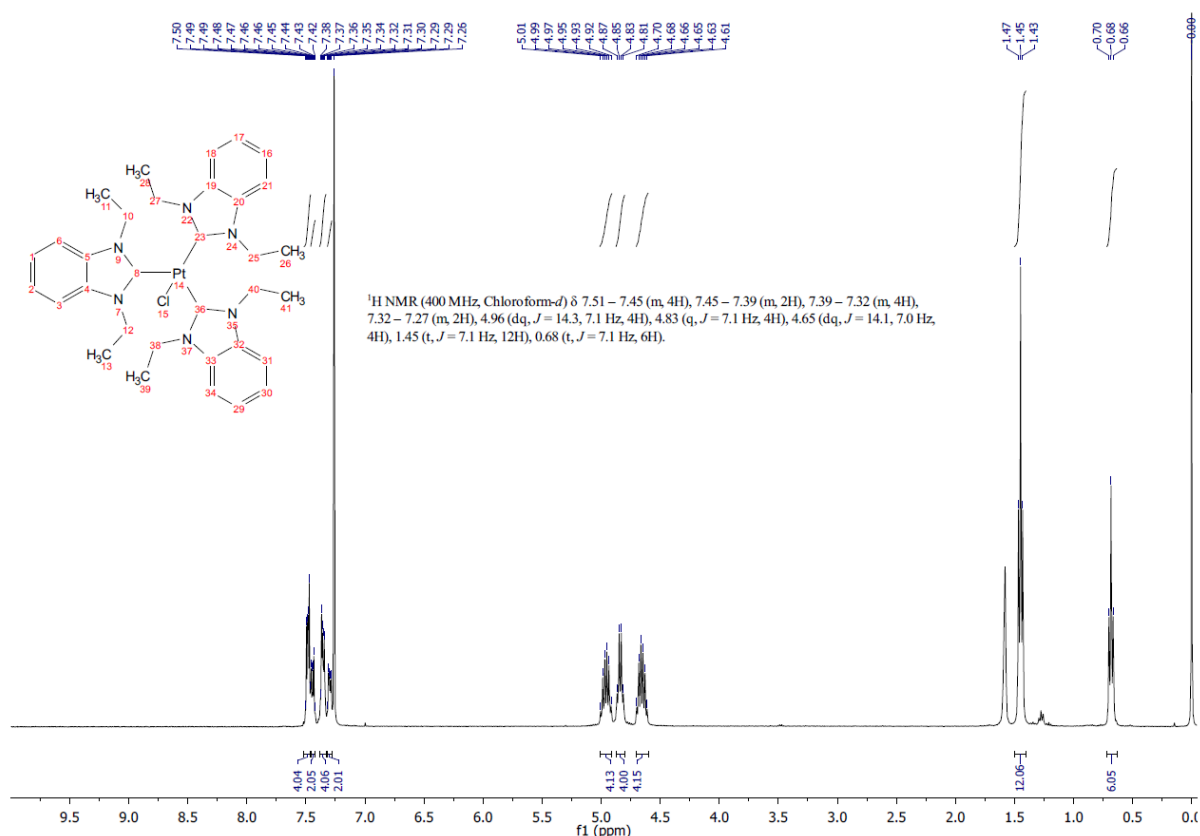

**Figure S14.** <sup>1</sup>H NMR spectrum (400 MHz) of **9** recorded in CDCl<sub>3</sub>.

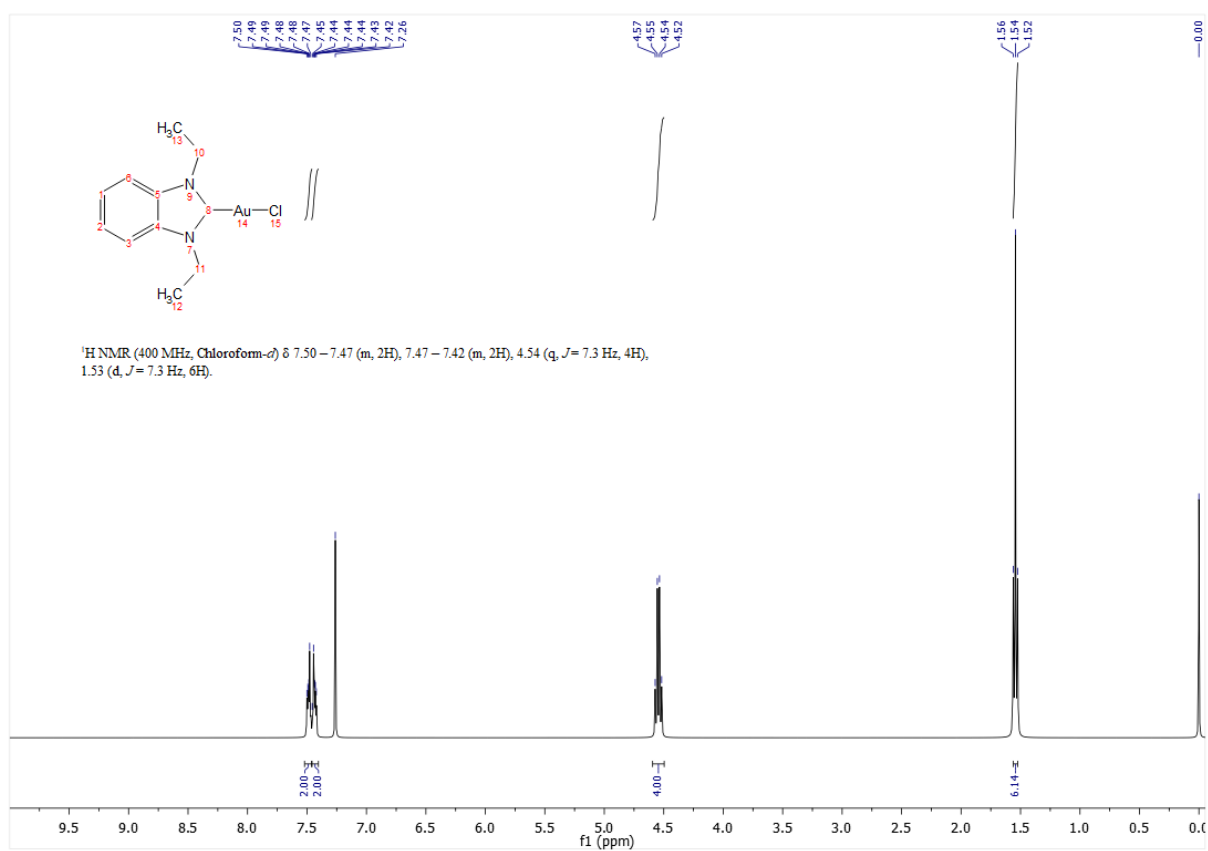

**Figure S15.** <sup>1</sup>H NMR spectrum (400 MHz) of **10** recorded in CDCl<sub>3</sub>.

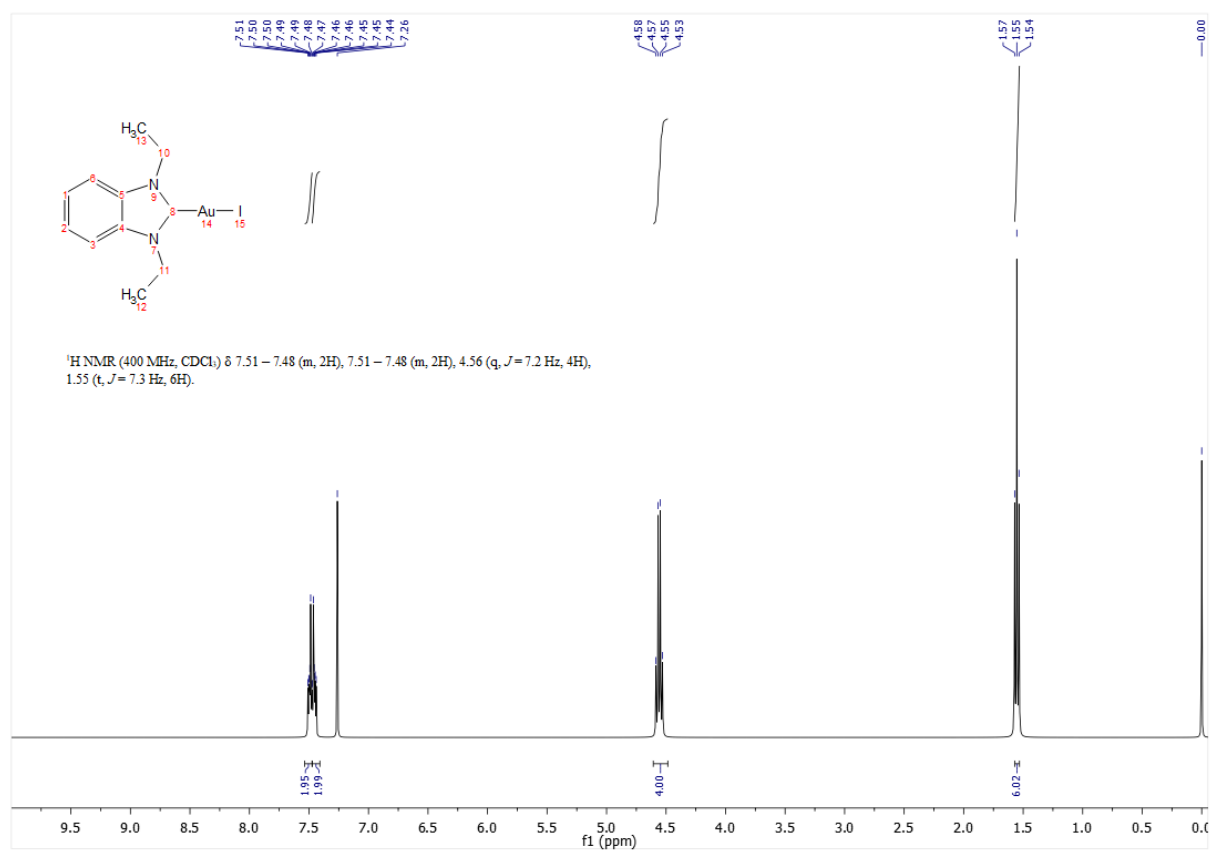

Figure S16. <sup>1</sup>H NMR spectrum (400 MHz) of **11** recorded in CDCl<sub>3</sub>.

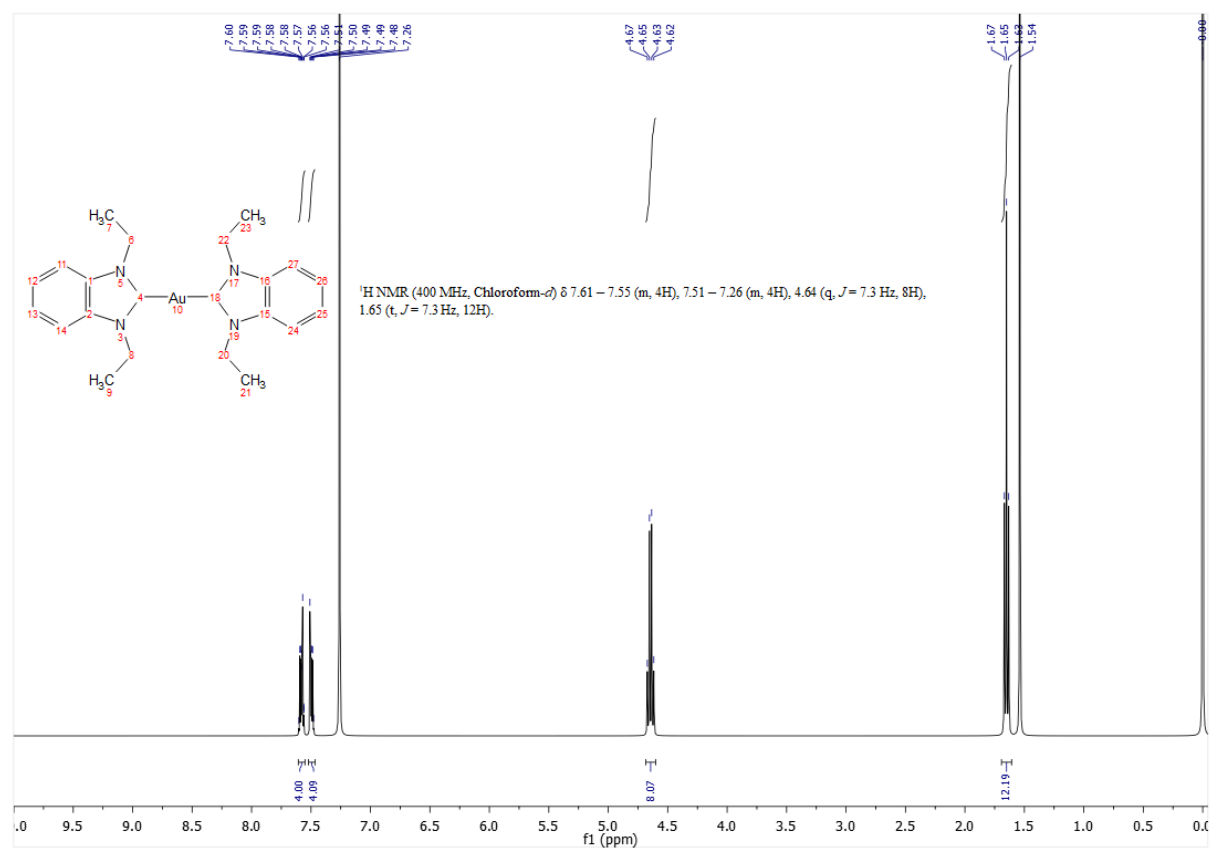

Figure S17. <sup>1</sup>H NMR spectrum (400 MHz) of **12** recorded in CDCl<sub>3</sub>.

#### 4. $^{13}\text{C}$ NMR Spectra of **2**, **4-6**, and **9-12**

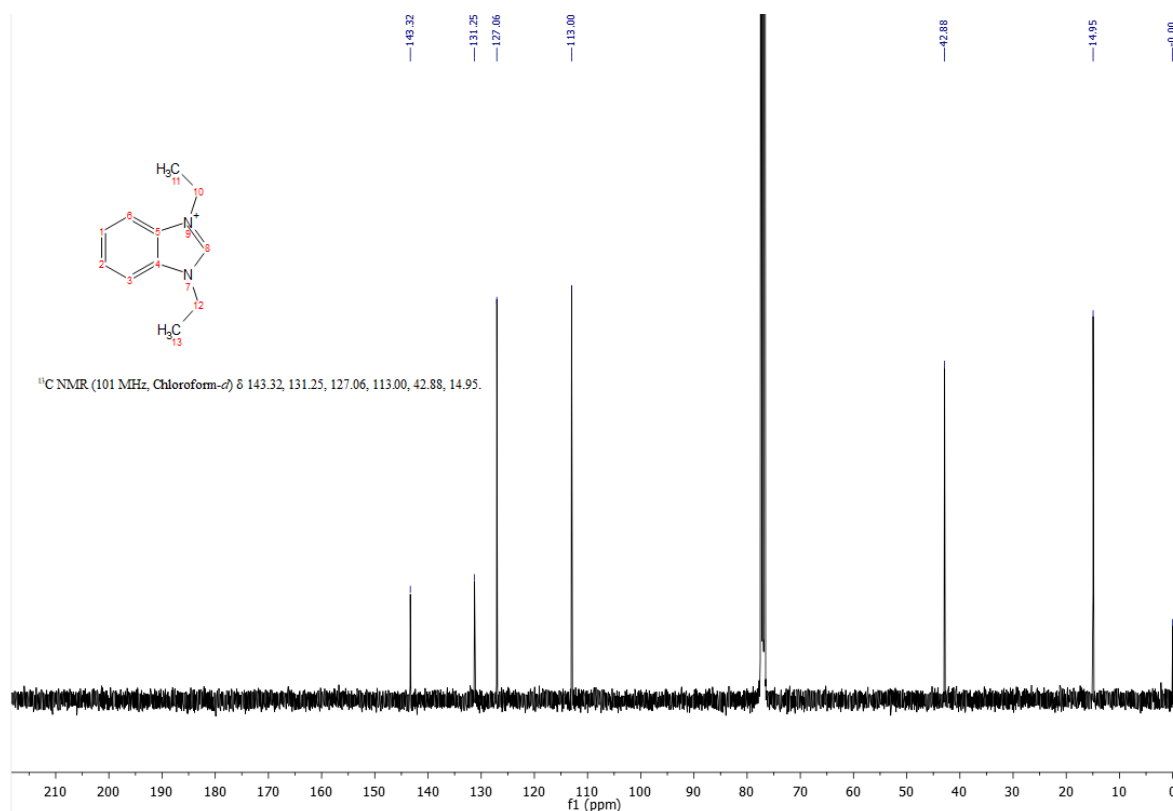

**Figure S18.**  $^{13}\text{C}$  NMR spectrum (101 MHz) of **2** recorded in  $\text{CDCl}_3$ .

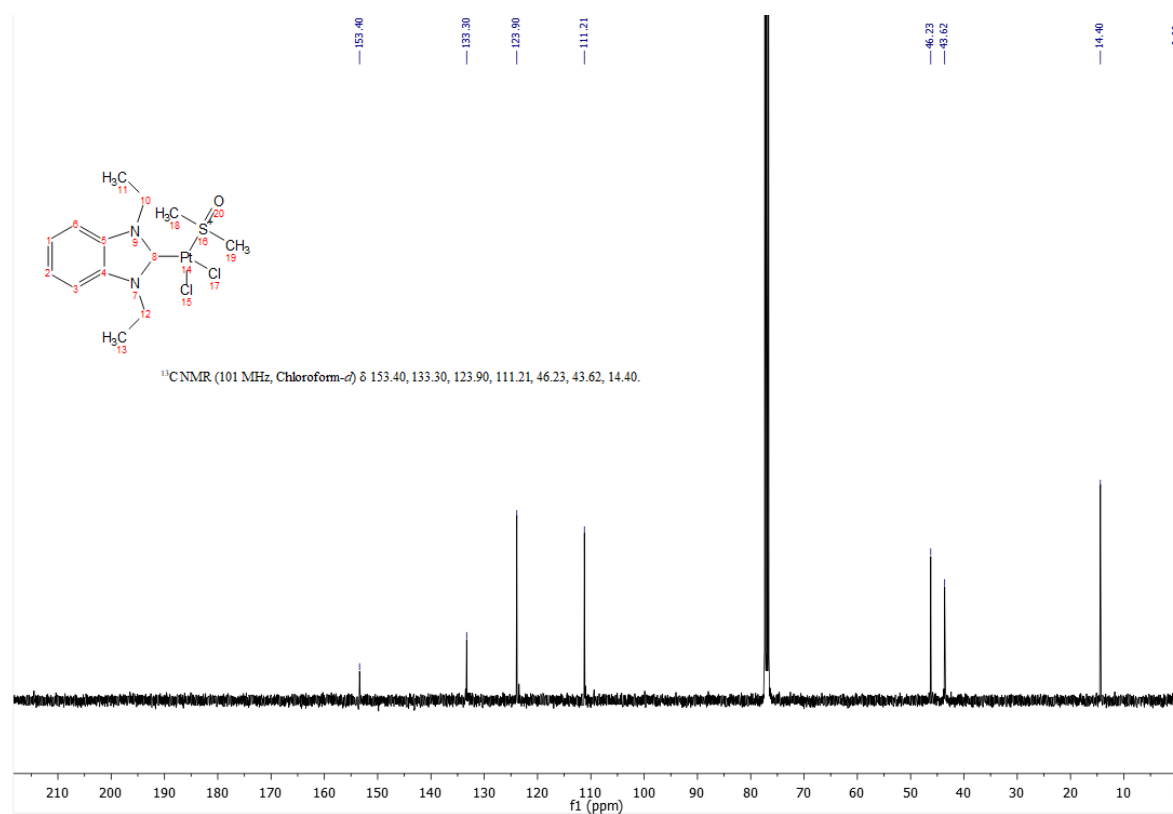

**Figure S19.**  $^{13}\text{C}$  NMR spectrum (101 MHz) of **4** recorded in  $\text{CDCl}_3$ .

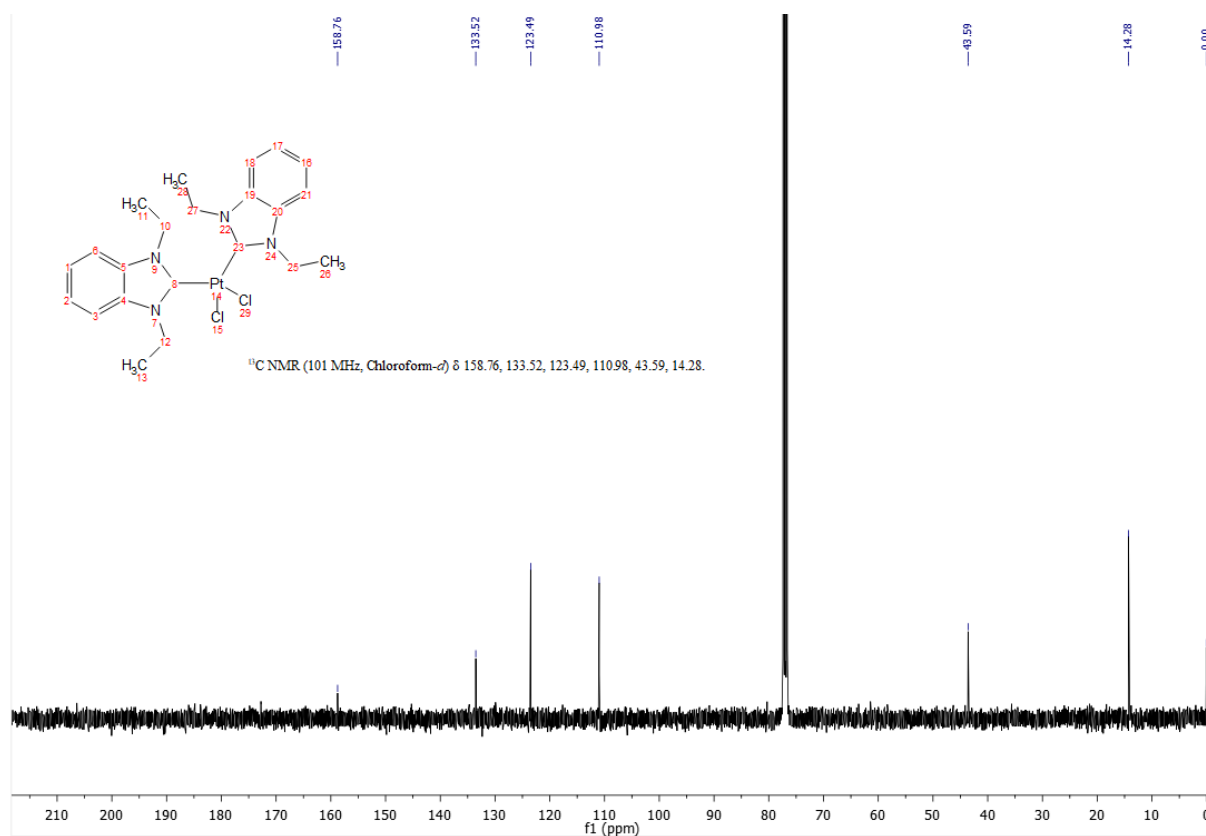

**Figure S20.** <sup>13</sup>C NMR spectrum (101 MHz) of **5** recorded in CDCl<sub>3</sub>.

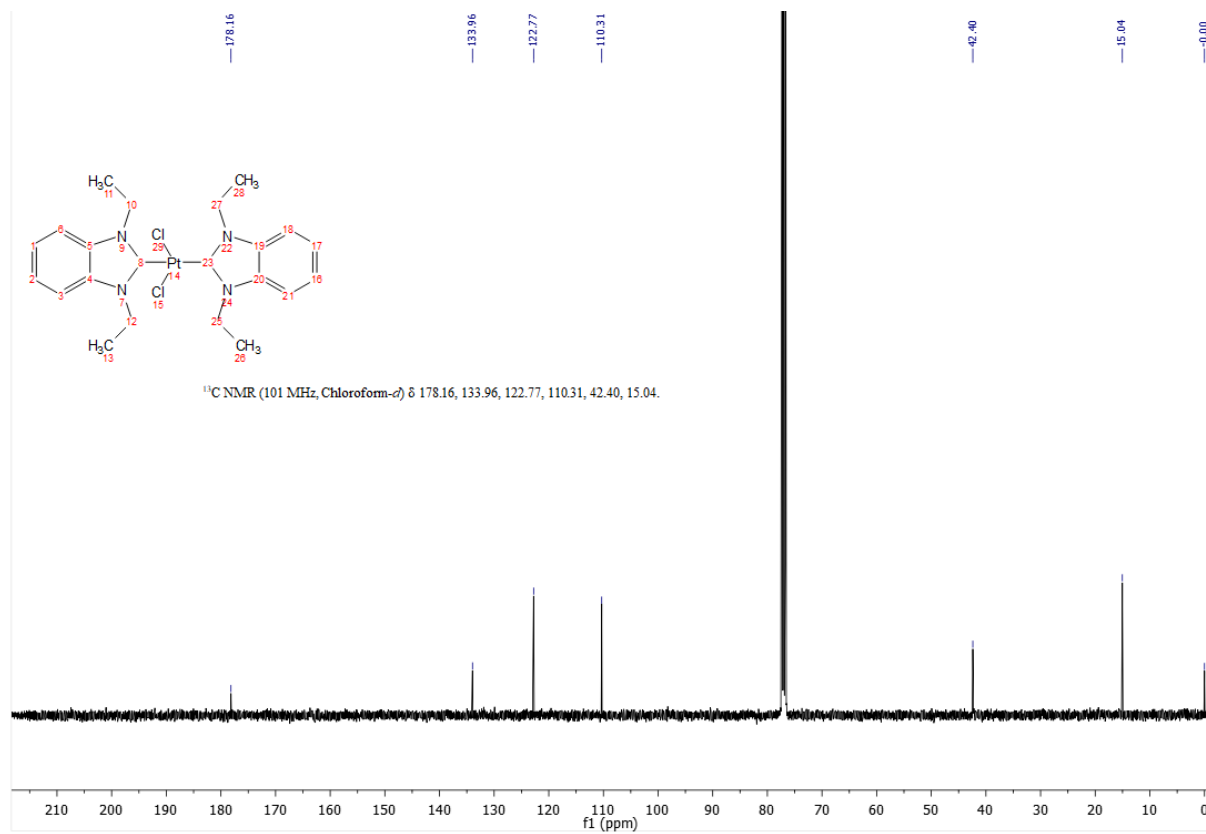

**Figure S21.** <sup>13</sup>C NMR spectrum (101 MHz) of **6** recorded in CDCl<sub>3</sub>.

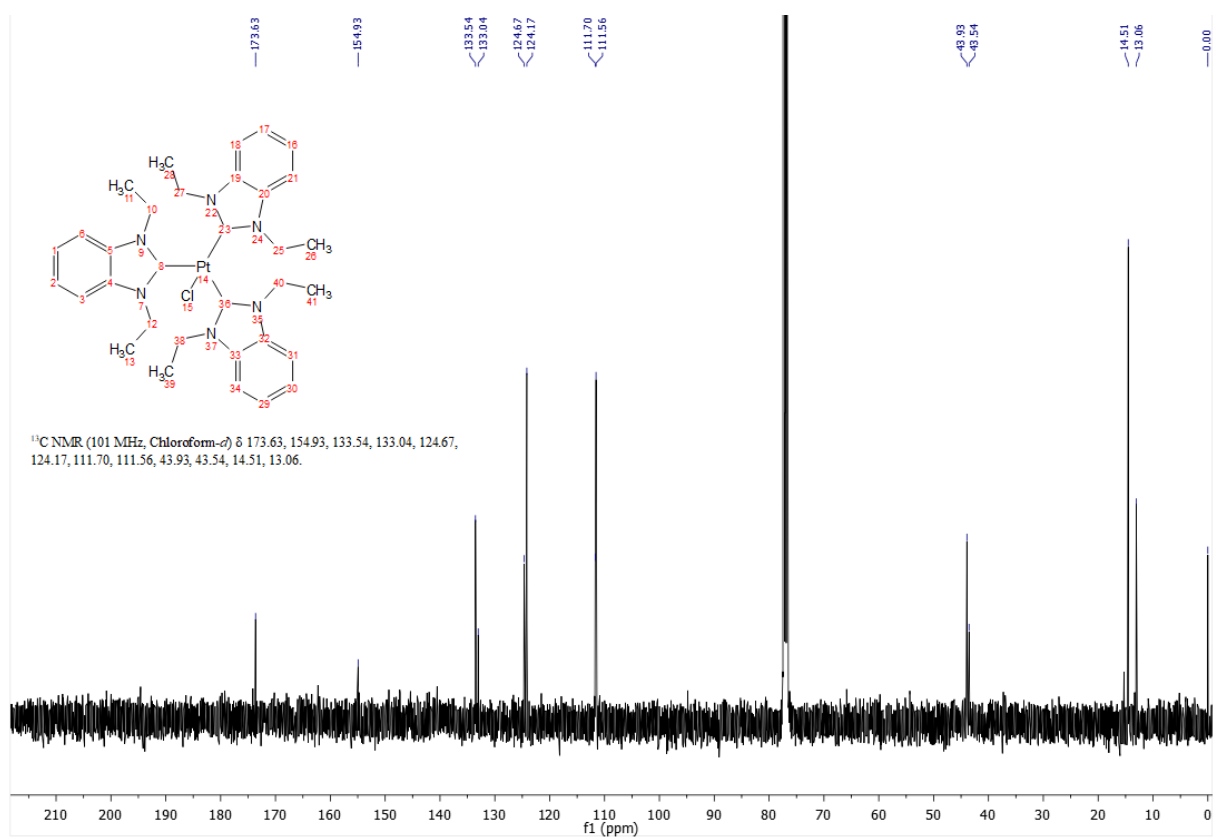

**Figure S22.** <sup>13</sup>C NMR spectrum (101 MHz) of **9** recorded in CDCl<sub>3</sub>.

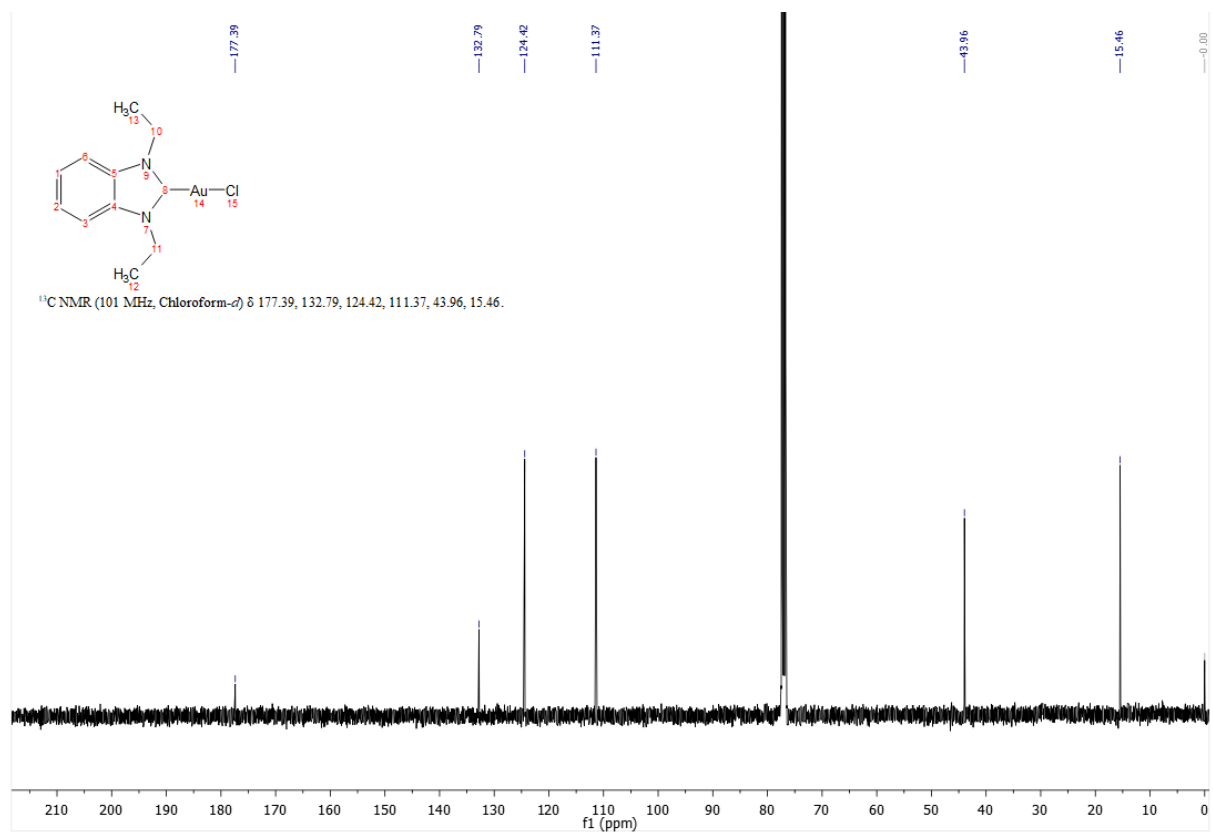

**Figure S23.** <sup>13</sup>C NMR spectrum (101 MHz) of **10** recorded in CDCl<sub>3</sub>.

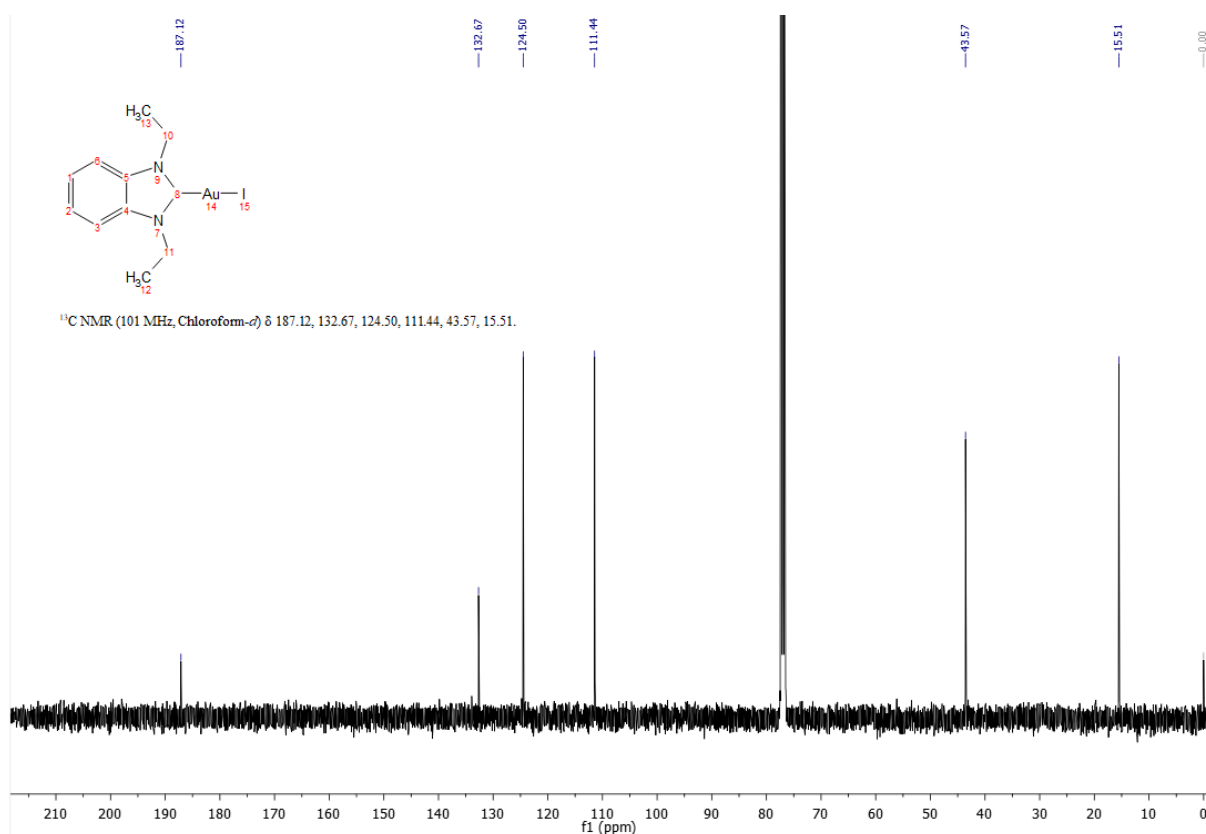

**Figure S24.** <sup>13</sup>C NMR spectrum (101 MHz) of **11** recorded in CDCl<sub>3</sub>.

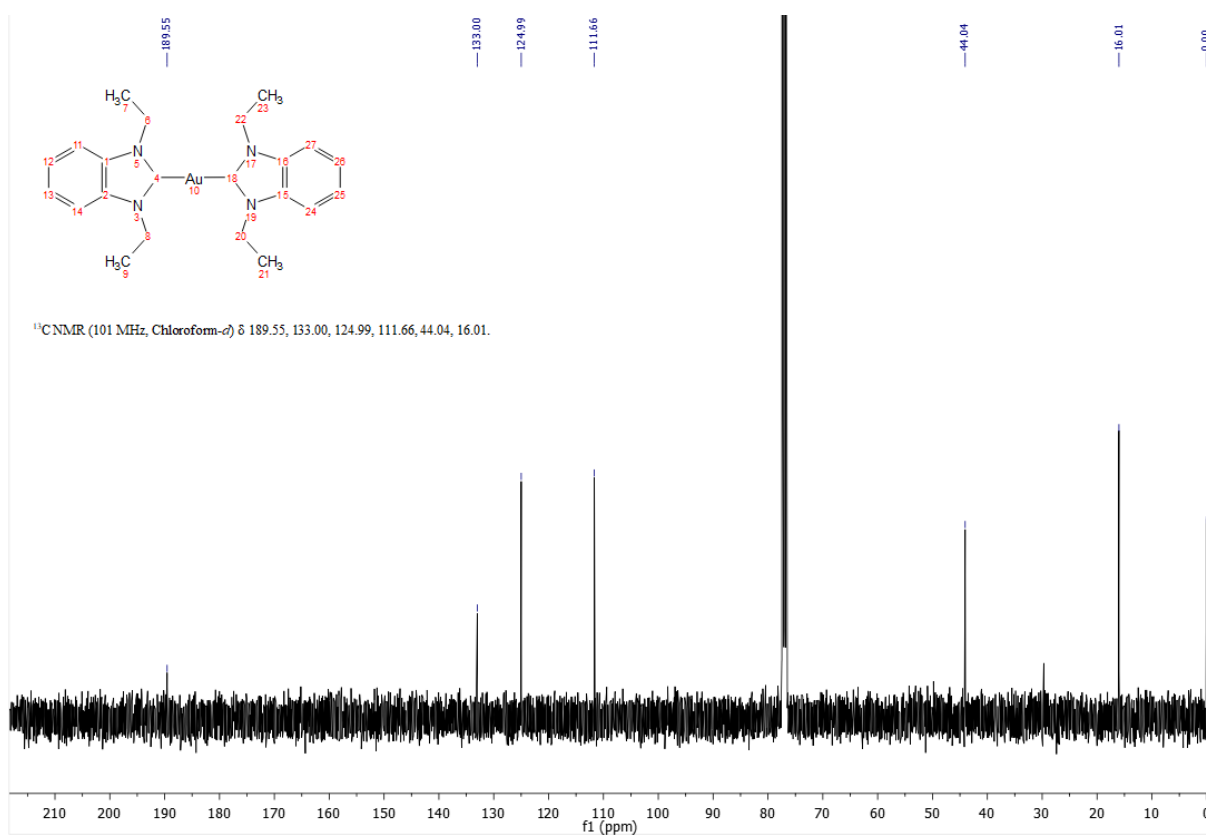

**Figure S25.** <sup>13</sup>C NMR spectrum (101 MHz) of **12** recorded in CDCl<sub>3</sub>.

## 5. $^{195}\text{Pt}$ NMR Spectra of **5**, **6**, and **9**

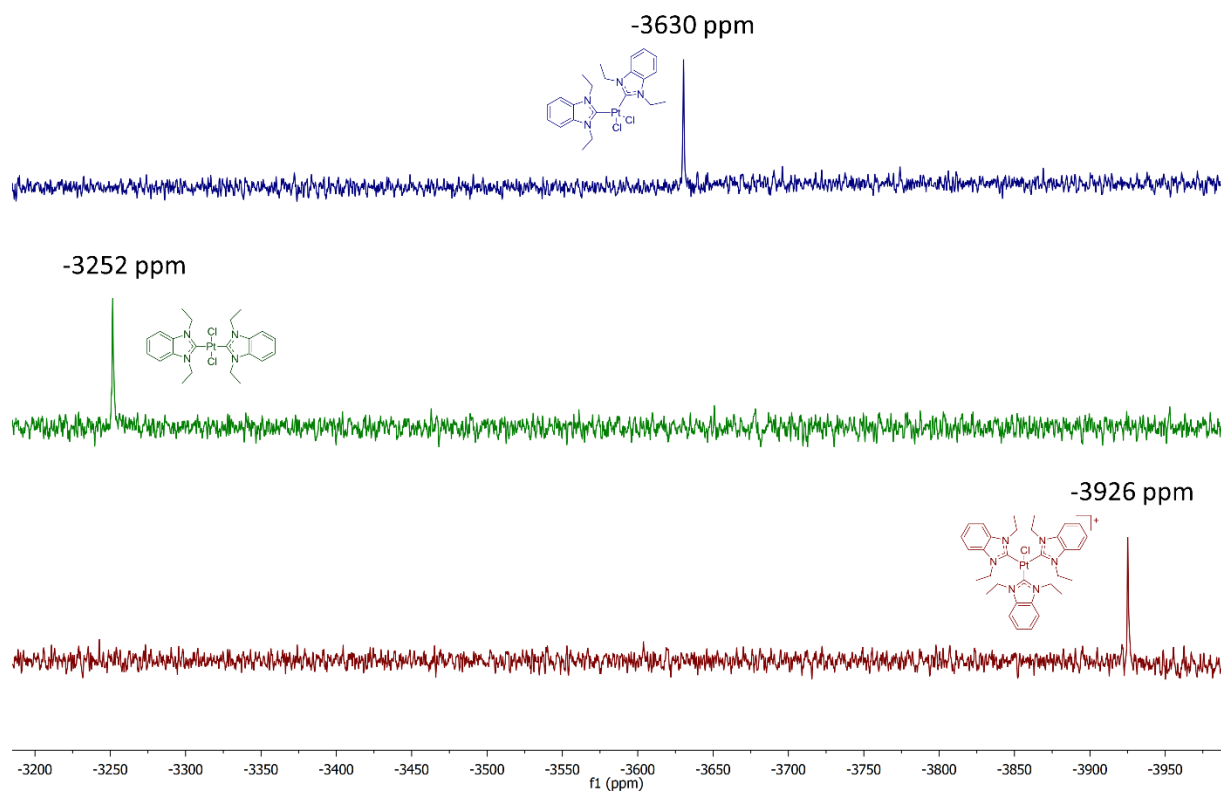

**Figure S26.**  $^{195}\text{Pt}$  NMR spectra (86 MHz) of **5** (top), **6** (middle), and **9** (bottom) recorded in  $\text{CDCl}_3$ . The spectra were processed with a line broadening factor of 40 Hz.

## 6. ESI-HRMS spectrum of **9**

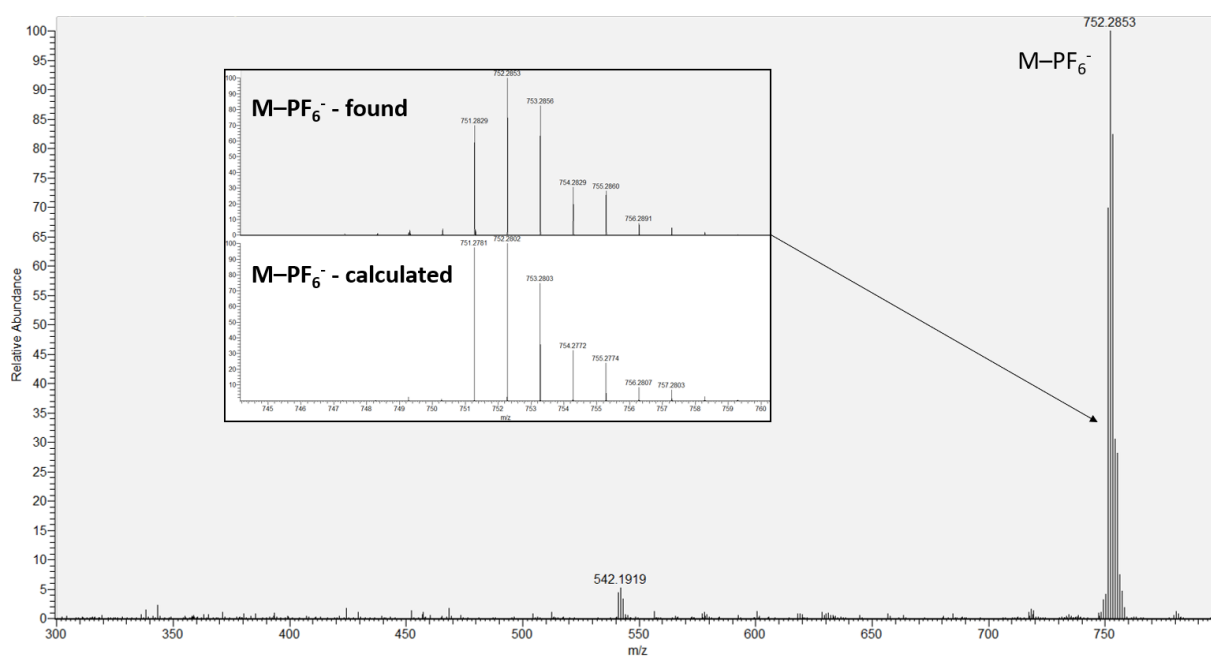

**Figure S27.** ESI-HRMS(+) spectrum of complex **9**.

## 7. X-ray Analysis of **1**, **5**, **6**, **8**, and **10**

### 7.1. Crystal Structures

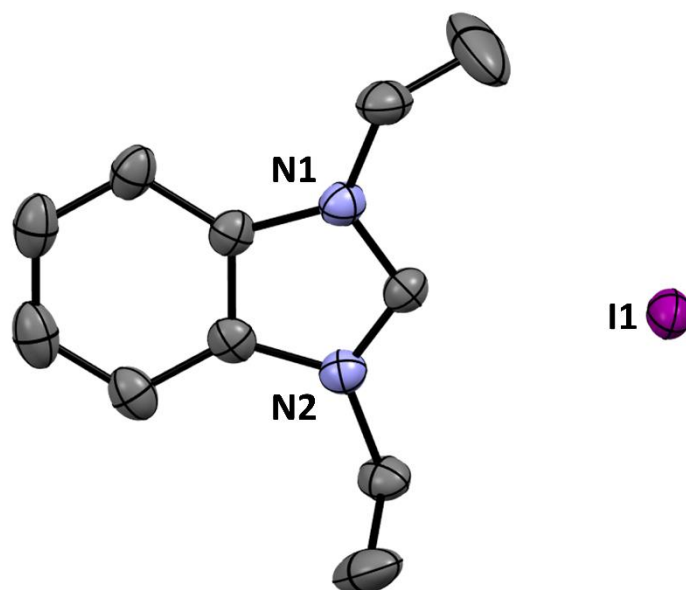

**Figure S28.** X-ray structure of the NHC ligand **1**. The thermal ellipsoids have been drawn at the 50% probability level.

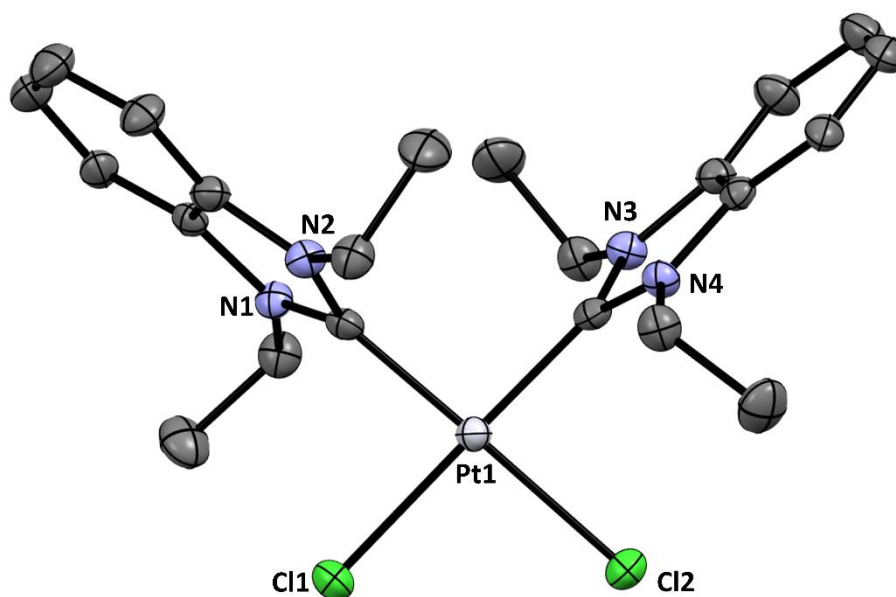

**Figure S29.** X-ray structure of *cis*-[PtL<sub>2</sub>Cl<sub>2</sub>] **5**. The thermal ellipsoids have been drawn at the 50% probability level.

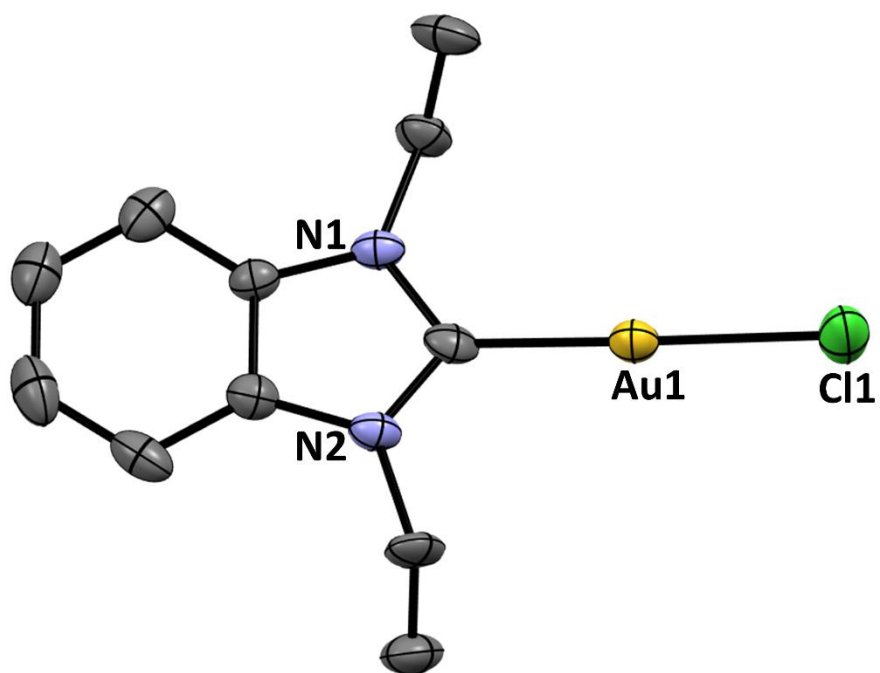

**Figure S30.** X-ray structure of [AuLCl] **10**. The thermal ellipsoids have been drawn at the 50% probability level.

## 7.2. Crystallographic Data

**Table S1.** Crystal data and structure refinement for **1**.

|                                   |                                                   |                  |
|-----------------------------------|---------------------------------------------------|------------------|
| CCDC number                       | 2267764                                           |                  |
| Empirical formula                 | C <sub>11</sub> H <sub>15</sub> IN <sub>2</sub>   |                  |
| Formula weight                    | 302.15                                            |                  |
| Temperature                       | 173.00 K                                          |                  |
| Wavelength                        | 0.71073 Å                                         |                  |
| Crystal system                    | Monoclinic                                        |                  |
| Space group                       | P2 <sub>1</sub> /c (no. 14)                       |                  |
| Unit cell dimensions              | a = 11.0644(4) Å                                  | α = 90°          |
|                                   | b = 14.5146(5) Å                                  | β = 90.3710(10)° |
|                                   | c = 15.1226(5) Å                                  | γ = 90°          |
| Volume                            | 2428.57(15) Å <sup>3</sup>                        |                  |
| Z                                 | 8                                                 |                  |
| Density (calculated)              | 1.653 mg/m <sup>3</sup>                           |                  |
| Absorption coefficient            | 2.604 mm <sup>-1</sup>                            |                  |
| F(000)                            | 1184                                              |                  |
| Crystal size                      | 0.16 x 0.08 x 0.04 mm <sup>3</sup>                |                  |
| Theta range for data collection   | 1.841 to 28.328°                                  |                  |
| Index ranges                      | -14 ≤ h ≤ 14, -19 ≤ k ≤ 19, -20 ≤ l ≤ 20          |                  |
| Reflections collected             | 58918                                             |                  |
| Independent reflections           | 6048 [R(int) = 0.0366]                            |                  |
| Completeness to theta = 25.242°   | 99.9 %                                            |                  |
| Absorption correction             | Semi-empirical from equivalents                   |                  |
| Max. and min. transmission        | 0.8621 and 0.7406                                 |                  |
| Refinement method                 | Full-matrix least-squares on F <sup>2</sup>       |                  |
| Data / restraints / parameters    | 6048 / 0 / 257                                    |                  |
| Goodness-of-fit on F <sup>2</sup> | 1.180                                             |                  |
| Final R indices [I > 2σ(I)]       | R <sub>1</sub> = 0.0405, wR <sub>2</sub> = 0.0877 |                  |
| R indices (all data)              | R <sub>1</sub> = 0.0459, wR <sub>2</sub> = 0.0893 |                  |
| Extinction coefficient            | n/a                                               |                  |
| Largest diff. peak and hole       | 1.113 and -0.858 e.Å <sup>-3</sup>                |                  |

**Table S2.** Crystal data and structure refinement for **5**.

|                                   |                                                                   |         |
|-----------------------------------|-------------------------------------------------------------------|---------|
| CCDC number                       | 2267765                                                           |         |
| Empirical formula                 | C <sub>22</sub> H <sub>28</sub> Cl <sub>2</sub> N <sub>4</sub> Pt |         |
| Formula weight                    | 614.47                                                            |         |
| Temperature                       | 173.00 K                                                          |         |
| Wavelength                        | 0.71073 Å                                                         |         |
| Crystal system                    | Orthorhombic                                                      |         |
| Space group                       | Fdd2 (no. 43)                                                     |         |
| Unit cell dimensions              | a = 12.7666(4) Å                                                  | α = 90° |
|                                   | b = 29.7845(9) Å                                                  | β = 90° |
|                                   | c = 11.9548(4) Å                                                  | γ = 90° |
| Volume                            | 4545.8(2) Å <sup>3</sup>                                          |         |
| Z                                 | 8                                                                 |         |
| Density (calculated)              | 1.796 mg/m <sup>3</sup>                                           |         |
| Absorption coefficient            | 6.424 mm <sup>-1</sup>                                            |         |
| F(000)                            | 2400                                                              |         |
| Crystal size                      | 0.12 x 0.06 x 0.03 mm <sup>3</sup>                                |         |
| Theta range for data collection   | 2.432 to 27.897°                                                  |         |
| Index ranges                      | -16 ≤ h ≤ 16, -39 ≤ k ≤ 39, -15 ≤ l ≤ 15                          |         |
| Reflections collected             | 24151                                                             |         |
| Independent reflections           | 2712 [R(int) = 0.0629]                                            |         |
| Completeness to theta = 25.242°   | 99.9 %                                                            |         |
| Absorption correction             | Semi-empirical from equivalents                                   |         |
| Max. and min. transmission        | 0.8014 and 0.5966                                                 |         |
| Refinement method                 | Full-matrix least-squares on F <sup>2</sup>                       |         |
| Data / restraints / parameters    | 2712 / 1 / 134                                                    |         |
| Goodness-of-fit on F <sup>2</sup> | 0.932                                                             |         |
| Final R indices [I > 2σ(I)]       | R <sub>1</sub> = 0.0160, wR <sub>2</sub> = 0.0312                 |         |
| R indices (all data)              | R <sub>1</sub> = 0.0192, wR <sub>2</sub> = 0.0316                 |         |
| Absolute structure parameter      | 0.008(5)                                                          |         |
| Extinction coefficient            | n/a                                                               |         |
| Largest diff. peak and hole       | 0.570 and -0.506 e.Å <sup>-3</sup>                                |         |

**Table S3.** Crystal data and structure refinement for **6**.

|                                   |                                                                   |                   |
|-----------------------------------|-------------------------------------------------------------------|-------------------|
| CCDC number                       | 2267766                                                           |                   |
| Empirical formula                 | C <sub>22</sub> H <sub>28</sub> Cl <sub>2</sub> N <sub>4</sub> Pt |                   |
| Formula weight                    | 614.47                                                            |                   |
| Temperature                       | 173.00 K                                                          |                   |
| Wavelength                        | 0.71073 Å                                                         |                   |
| Crystal system                    | Triclinic                                                         |                   |
| Space group                       | P-1(no. 2)                                                        |                   |
| Unit cell dimensions              | a = 8.1511(4) Å                                                   | α = 106.5240(10)° |
|                                   | b = 8.8139(4) Å                                                   | β = 92.733(2)°    |
|                                   | c = 8.9475(4) Å                                                   | γ = 113.6690(10)° |
| Volume                            | 554.75(4) Å <sup>3</sup>                                          |                   |
| Z                                 | 1                                                                 |                   |
| Density (calculated)              | 1.839 mg/m <sup>3</sup>                                           |                   |
| Absorption coefficient            | 6.580 mm <sup>-1</sup>                                            |                   |
| F(000)                            | 300                                                               |                   |
| Crystal size                      | 0.21 x 0.17 x 0.12 mm <sup>3</sup>                                |                   |
| Theta range for data collection   | 2.416 to 28.368°                                                  |                   |
| Index ranges                      | -10 ≤ h ≤ 10, -11 ≤ k ≤ 11, -11 ≤ l ≤ 11                          |                   |
| Reflections collected             | 20548                                                             |                   |
| Independent reflections           | 2748 [R(int) = 0.0629]                                            |                   |
| Completeness to theta = 25.242°   | 99.1 %                                                            |                   |
| Absorption correction             | Semi-empirical from equivalents                                   |                   |
| Max. and min. transmission        | 0.6944 and 0.4617                                                 |                   |
| Refinement method                 | Full-matrix least-squares on F <sup>2</sup>                       |                   |
| Data / restraints / parameters    | 2748 / 0 / 136                                                    |                   |
| Goodness-of-fit on F <sup>2</sup> | 1.065                                                             |                   |
| Final R indices [I > 2σ(I)]       | R <sub>1</sub> = 0.0177, wR <sub>2</sub> = 0.0381                 |                   |
| R indices (all data)              | R <sub>1</sub> = 0.0177, wR <sub>2</sub> = 0.0381                 |                   |
| Extinction coefficient            | 0.0128(12)                                                        |                   |
| Largest diff. peak and hole       | 1.249 and -0.986 e.Å <sup>-3</sup>                                |                   |

**Table S4.** Crystal data and structure refinement for **8**.

|                                   |                                                                  |         |
|-----------------------------------|------------------------------------------------------------------|---------|
| CCDC number                       | 2267767                                                          |         |
| Empirical formula                 | C <sub>22</sub> H <sub>28</sub> I <sub>2</sub> N <sub>4</sub> Pt |         |
| Formula weight                    | 797.37                                                           |         |
| Temperature                       | 295.15 K                                                         |         |
| Wavelength                        | 0.71073 Å                                                        |         |
| Crystal system                    | Orthorhombic                                                     |         |
| Space group                       | Pbca (no. 61)                                                    |         |
| Unit cell dimensions              | a = 12.5666(5) Å                                                 | α = 90° |
|                                   | b = 9.2622(4) Å                                                  | β = 90° |
|                                   | c = 21.4634(9) Å                                                 | γ = 90° |
| Volume                            | 2498.22(18) Å <sup>3</sup>                                       |         |
| Z                                 | 4                                                                |         |
| Density (calculated)              | 2.120 mg/m <sup>3</sup>                                          |         |
| Absorption coefficient            | 8.103 mm <sup>-1</sup>                                           |         |
| F(000)                            | 1488                                                             |         |
| Crystal size                      | 0.29 x 0.18 x 0.14 mm <sup>3</sup>                               |         |
| Theta range for data collection   | 2.496 to 28.751°                                                 |         |
| Index ranges                      | -16 ≤ h ≤ 16, -12 ≤ k ≤ 12, -29 ≤ l ≤ 29                         |         |
| Reflections collected             | 71184                                                            |         |
| Independent reflections           | 3228 [R(int) = 0.0651]                                           |         |
| Completeness to theta = 25.242°   | 99.3 %                                                           |         |
| Absorption correction             | Semi-empirical from equivalents                                  |         |
| Max. and min. transmission        | 0.7247 and 0.2446                                                |         |
| Refinement method                 | Full-matrix least-squares on F <sup>2</sup>                      |         |
| Data / restraints / parameters    | 3228 / 0 / 136                                                   |         |
| Goodness-of-fit on F <sup>2</sup> | 1.145                                                            |         |
| Final R indices [I > 2σ(I)]       | R <sub>1</sub> = 0.0222, wR <sub>2</sub> = 0.0531                |         |
| R indices (all data)              | R <sub>1</sub> = 0.0247, wR <sub>2</sub> = 0.0548                |         |
| Extinction coefficient            | 0.00177(13)                                                      |         |
| Largest diff. peak and hole       | 1.109 and -0.881 e.Å <sup>-3</sup>                               |         |

**Table S5.** Crystal data and structure refinement for **9**.

|                                   |                                                                                               |                  |
|-----------------------------------|-----------------------------------------------------------------------------------------------|------------------|
| CCDC number                       | 2267768                                                                                       |                  |
| Empirical formula                 | C <sub>33</sub> H <sub>42</sub> ClF <sub>6</sub> N <sub>6</sub> Ppt x 0.25 CH <sub>3</sub> OH |                  |
| Formula weight                    | 905.74                                                                                        |                  |
| Temperature                       | 153.00 K                                                                                      |                  |
| Wavelength                        | 0.71073 Å                                                                                     |                  |
| Crystal system                    | Monoclinic                                                                                    |                  |
| Space group                       | P 2 <sub>1</sub> /c (no. 14)                                                                  |                  |
| Unit cell dimensions              | a = 14.0281(7) Å                                                                              | α = 90°          |
|                                   | b = 12.7311(6) Å                                                                              | β = 94.5881(17)° |
|                                   | c = 41.196(2) Å                                                                               | γ = 90°          |
| Volume                            | 7333.7(6) Å <sup>3</sup>                                                                      |                  |
| Z                                 | 8                                                                                             |                  |
| Density (calculated)              | 1.641 mg/m <sup>3</sup>                                                                       |                  |
| Absorption coefficient            | 4.007 mm <sup>-1</sup>                                                                        |                  |
| F(000)                            | 3600                                                                                          |                  |
| Crystal size                      | 0.14 x 0.05 x 0.03 mm <sup>3</sup>                                                            |                  |
| Theta range for data collection   | 1.882 to 25.497°                                                                              |                  |
| Index ranges                      | -16<=h<=16, -15<=k<=15, -49<=l<=49                                                            |                  |
| Reflections collected             | 140487                                                                                        |                  |
| Independent reflections           | 13612 [R(int) = 0.0459]                                                                       |                  |
| Completeness to theta = 25.242°   | 99.9 %                                                                                        |                  |
| Absorption correction             | Semi-empirical from equivalents                                                               |                  |
| Max. and min. transmission        | 0.8748 and 0.6484                                                                             |                  |
| Refinement method                 | Full-matrix least-squares on F <sup>2</sup>                                                   |                  |
| Data / restraints / parameters    | 13612 / 0 / 910                                                                               |                  |
| Goodness-of-fit on F <sup>2</sup> | 1.259                                                                                         |                  |
| Final R indices [I>2σ(I)]         | R <sub>1</sub> = 0.0402, wR <sub>2</sub> = 0.0838                                             |                  |
| R indices (all data)              | R <sub>1</sub> = 0.0430, wR <sub>2</sub> = 0.0847                                             |                  |
| Extinction coefficient            | n/a                                                                                           |                  |
| Largest diff. peak and hole       | 2.316 and -2.142 e.Å <sup>-3</sup>                                                            |                  |

**Table S6.** Crystal data and structure refinement for **10**.

|                                   |                                                    |                   |
|-----------------------------------|----------------------------------------------------|-------------------|
| CCDC number                       | 2267769                                            |                   |
| Empirical formula                 | C <sub>11</sub> H <sub>14</sub> AuClN <sub>2</sub> |                   |
| Formula weight                    | 406.66                                             |                   |
| Temperature                       | 173.00 K                                           |                   |
| Wavelength                        | 0.71073 Å                                          |                   |
| Crystal system                    | Triclinic                                          |                   |
| Space group                       | P-1 (no. 2)                                        |                   |
| Unit cell dimensions              | a = 7.3500(3) Å                                    | α = 114.7106(14)° |
|                                   | b = 9.3720(4) Å                                    | β = 96.1579(15)°  |
|                                   | c = 9.7743(5) Å                                    | γ = 90.3251(15)°  |
| Volume                            | 607.16(5) Å <sup>3</sup>                           |                   |
| Z                                 | 2                                                  |                   |
| Density (calculated)              | 2.224 mg/m <sup>3</sup>                            |                   |
| Absorption coefficient            | 12.304 mm <sup>-1</sup>                            |                   |
| F(000)                            | 380                                                |                   |
| Crystal size                      | 0.14 x 0.04 x 0.03 mm <sup>3</sup>                 |                   |
| Theta range for data collection   | 2.311 to 25.749°                                   |                   |
| Index ranges                      | -8 ≤ h ≤ 8, -11 ≤ k ≤ 10, 0 ≤ l ≤ 11               |                   |
| Reflections collected             | 2314                                               |                   |
| Independent reflections           | 2314 [R(int) = ?]                                  |                   |
| Completeness to theta = 25.242°   | 99.7 %                                             |                   |
| Absorption correction             | Semi-empirical from equivalents                    |                   |
| Max. and min. transmission        | 0.5620 and 0.3012                                  |                   |
| Refinement method                 | Full-matrix least-squares on F <sup>2</sup>        |                   |
| Data / restraints / parameters    | 2314 / 0 / 139                                     |                   |
| Goodness-of-fit on F <sup>2</sup> | 1.148                                              |                   |
| Final R indices [I > 2σ(I)]       | R <sub>1</sub> = 0.0230, wR <sub>2</sub> = 0.0546  |                   |
| R indices (all data)              | R <sub>1</sub> = 0.0254, wR <sub>2</sub> = 0.0568  |                   |
| Extinction coefficient            | n/a                                                |                   |
| Largest diff. peak and hole       | 1.378 and -0.677 e.Å <sup>-3</sup>                 |                   |

**Table S7.** Crystal data and structure refinement for **12**.

|                                   |                                                                   |         |
|-----------------------------------|-------------------------------------------------------------------|---------|
| CCDC number*                      | 2267770                                                           |         |
| Empirical formula                 | C <sub>22</sub> H <sub>28</sub> AuF <sub>6</sub> N <sub>4</sub> P |         |
| Formula weight                    | 690.42                                                            |         |
| Temperature                       | 173.00 K                                                          |         |
| Wavelength                        | 0.71073 Å                                                         |         |
| Crystal system                    | Orthorhombic                                                      |         |
| Space group                       | Pna2 <sub>1</sub> (no. 33)                                        |         |
| Unit cell dimensions              | a = 11.4102(6) Å                                                  | α = 90° |
|                                   | b = 21.7489(11) Å                                                 | β = 90° |
|                                   | c = 10.1452(4) Å                                                  | γ = 90° |
| Volume                            | 2517.6(2) Å <sup>3</sup>                                          |         |
| Z                                 | 4                                                                 |         |
| Density (calculated)              | 1.822 mg/m <sup>3</sup>                                           |         |
| Absorption coefficient            | 5.969 mm <sup>-1</sup>                                            |         |
| F(000)                            | 1344                                                              |         |
| Crystal size                      | 0.22 x 0.2 x 0.18 mm <sup>3</sup>                                 |         |
| Theta range for data collection   | 2.215 to 28.311°                                                  |         |
| Index ranges                      | -15 ≤ h ≤ 15, -28 ≤ k ≤ 29, -13 ≤ l ≤ 13                          |         |
| Reflections collected             | 64943                                                             |         |
| Independent reflections           | 6163 [R(int) = 0.0488]                                            |         |
| Completeness to theta = 25.242°   | 99.2 %                                                            |         |
| Absorption correction             | Semi-empirical from equivalents                                   |         |
| Max. and min. transmission        | 0.4920 and 0.2064                                                 |         |
| Refinement method                 | Full-matrix least-squares on F <sup>2</sup>                       |         |
| Data / restraints / parameters    | 6163 / 1 / 348                                                    |         |
| Goodness-of-fit on F <sup>2</sup> | 1.058                                                             |         |
| Final R indices [I > 2σ(I)]       | R <sub>1</sub> = 0.0206, wR <sub>2</sub> = 0.0418                 |         |
| R indices (all data)              | R <sub>1</sub> = 0.0219, wR <sub>2</sub> = 0.0423                 |         |
| Absolute structure parameter      | 0.043(6)                                                          |         |
| Extinction coefficient            | n/a                                                               |         |
| Largest diff. peak and hole       | 0.333 and -1.937 e.Å <sup>-3</sup>                                |         |

\*X-ray crystal structure has been already published (*Organometallics* **2005**, *24*, 486-493.) and it is also available at CCDC (264468).

## 8. Additional HPLC Chromatograms

### 8.1. Stability in Organic Solvents

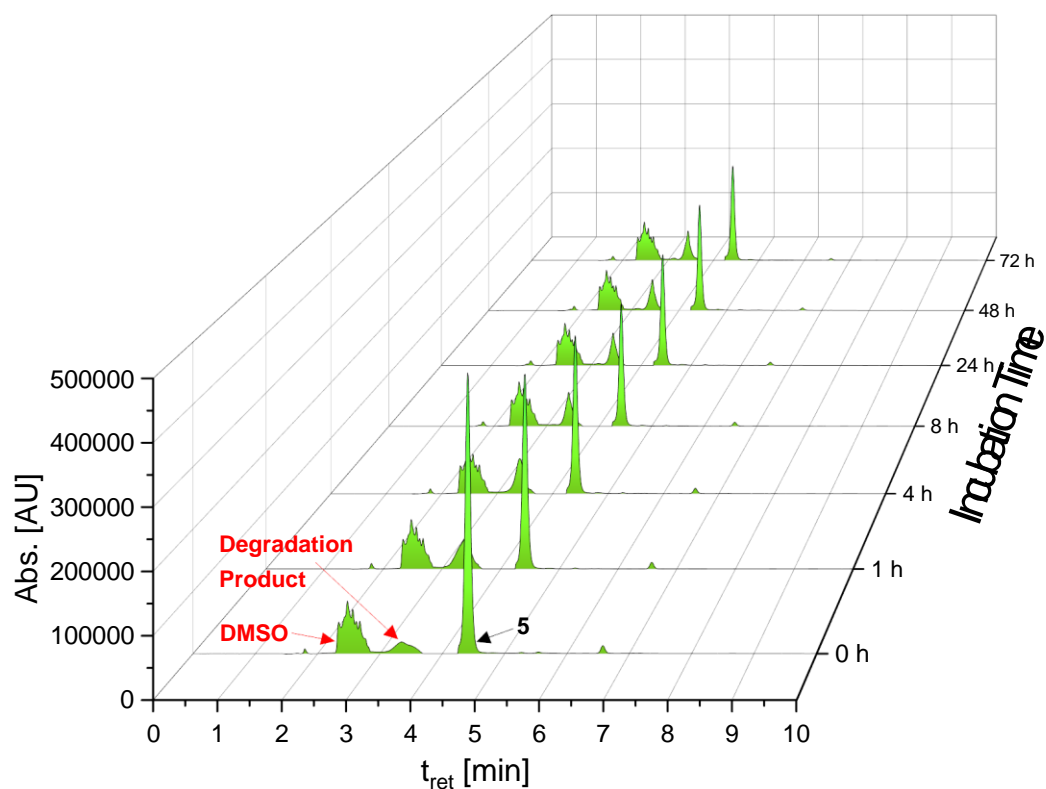

**Figure S31.** HPLC chromatograms of **5** incubated in DMSO up to 72 h. Complex concentration: 0.5 mM.

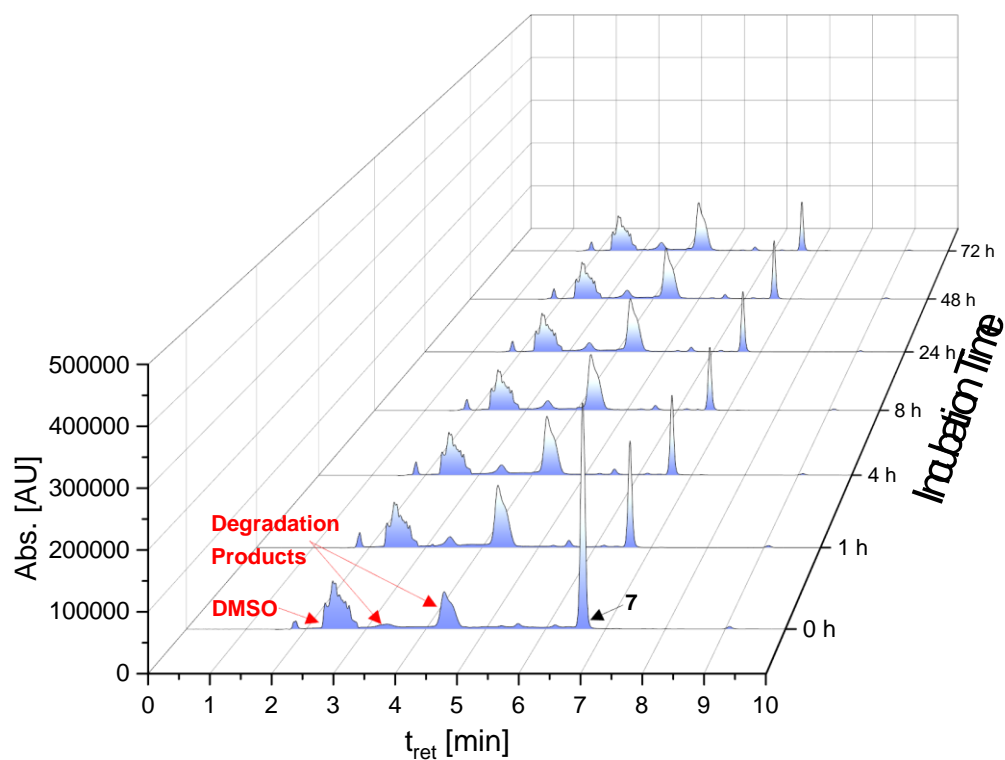

**Figure S32.** HPLC chromatograms of **7** incubated in DMSO up to 72 h. Complex concentration: 0.5 mM.

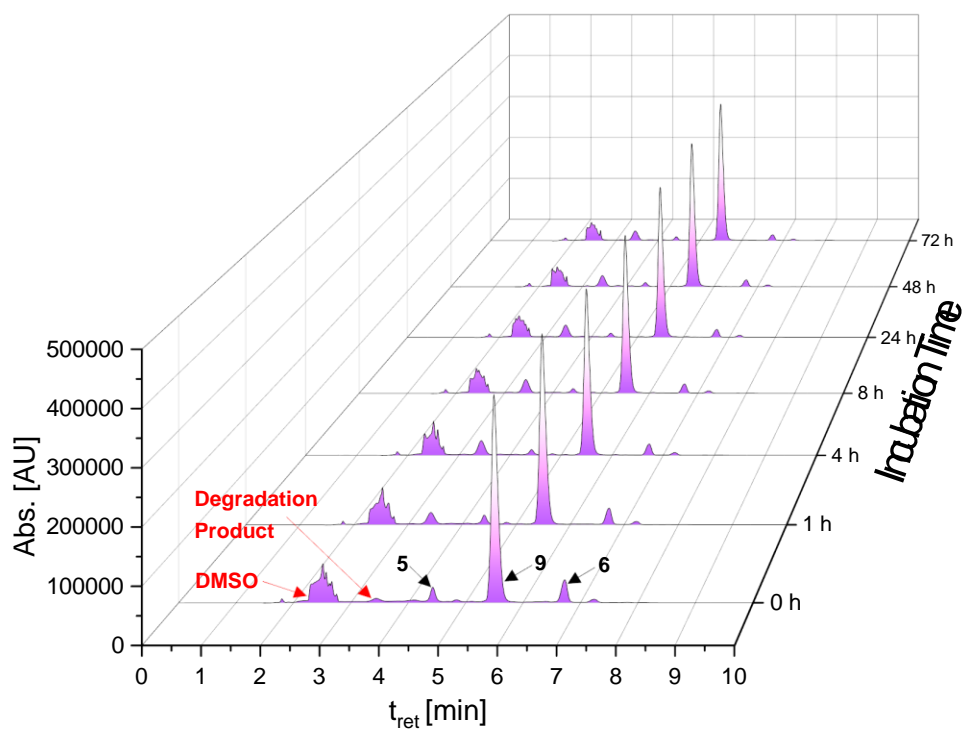

**Figure S33.** HPLC chromatograms of **9** incubated in DMSO up to 72 h. Complex concentration: 0.5 mM. Peaks **5** and **6** in the chromatograms of **9** come from synthesis (side products).

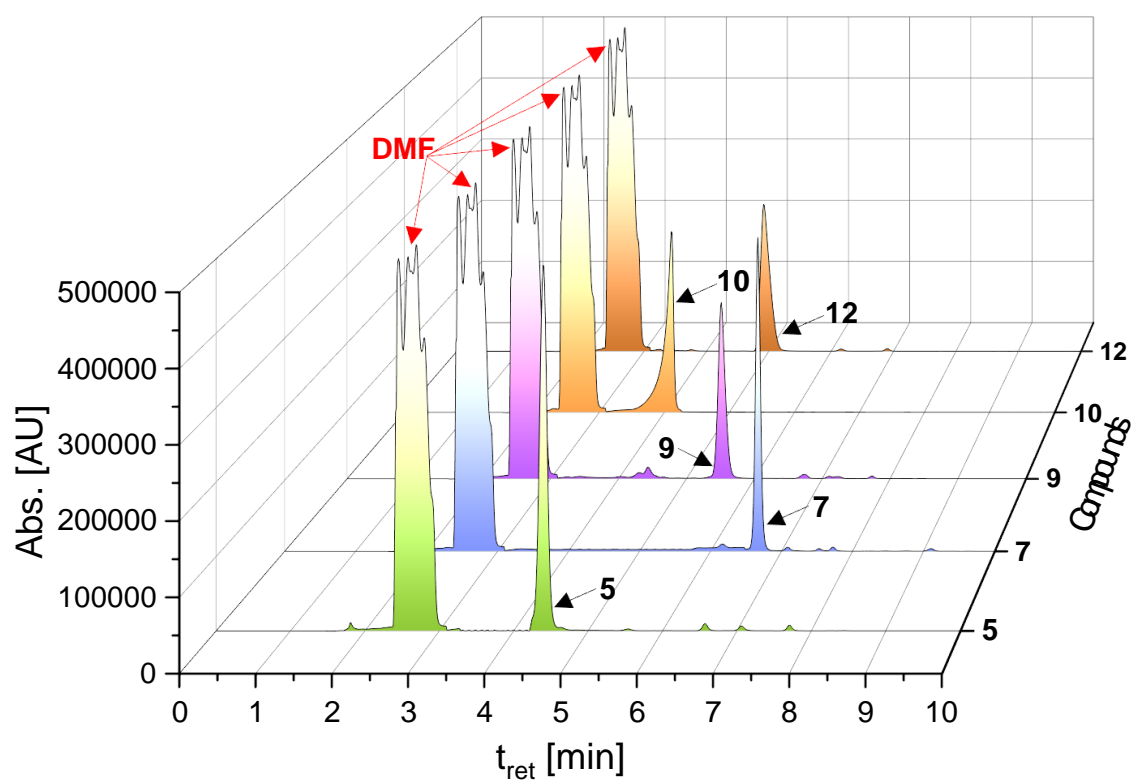

**Figure S34.** HPLC chromatograms of complexes **5**, **7**, **9**, **10**, and **12** in DMF at  $t = 72$  h. Complex concentration: 0.5 mM.

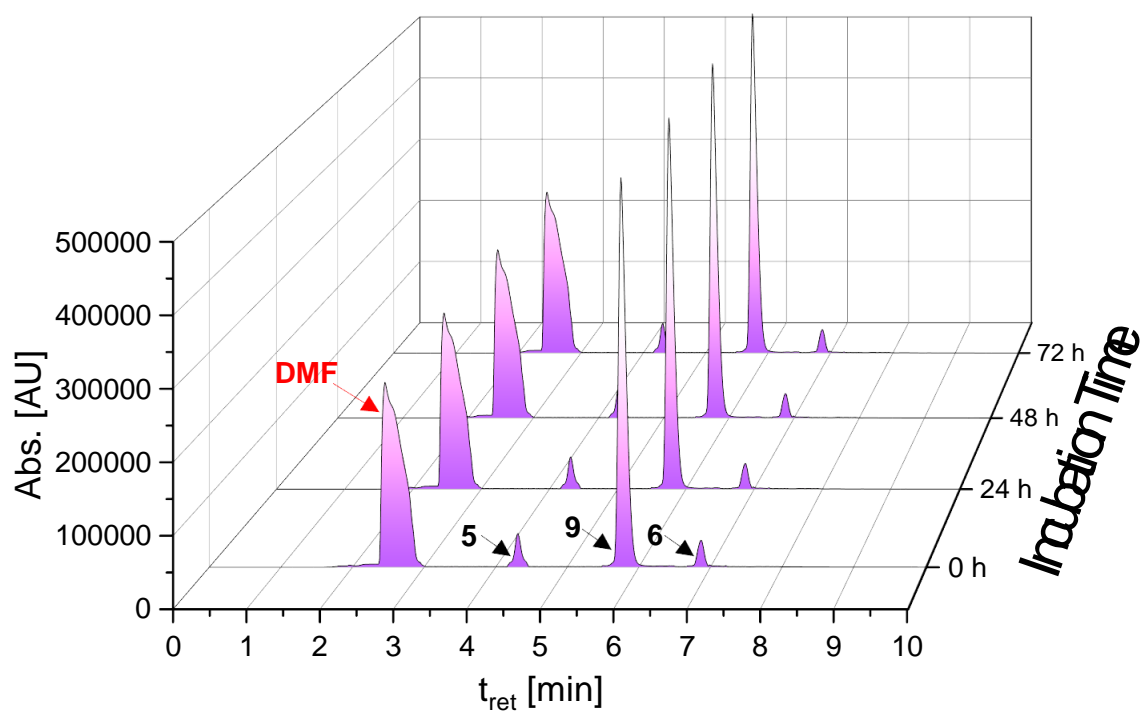

**Figure S35.** HPLC chromatograms of **9** incubated in DMF/water = 50:50 (v/v) up to 72 h. Complex concentration: 0.5 mM. Peaks **5** and **6** in the chromatograms of **9** come from synthesis (side products).

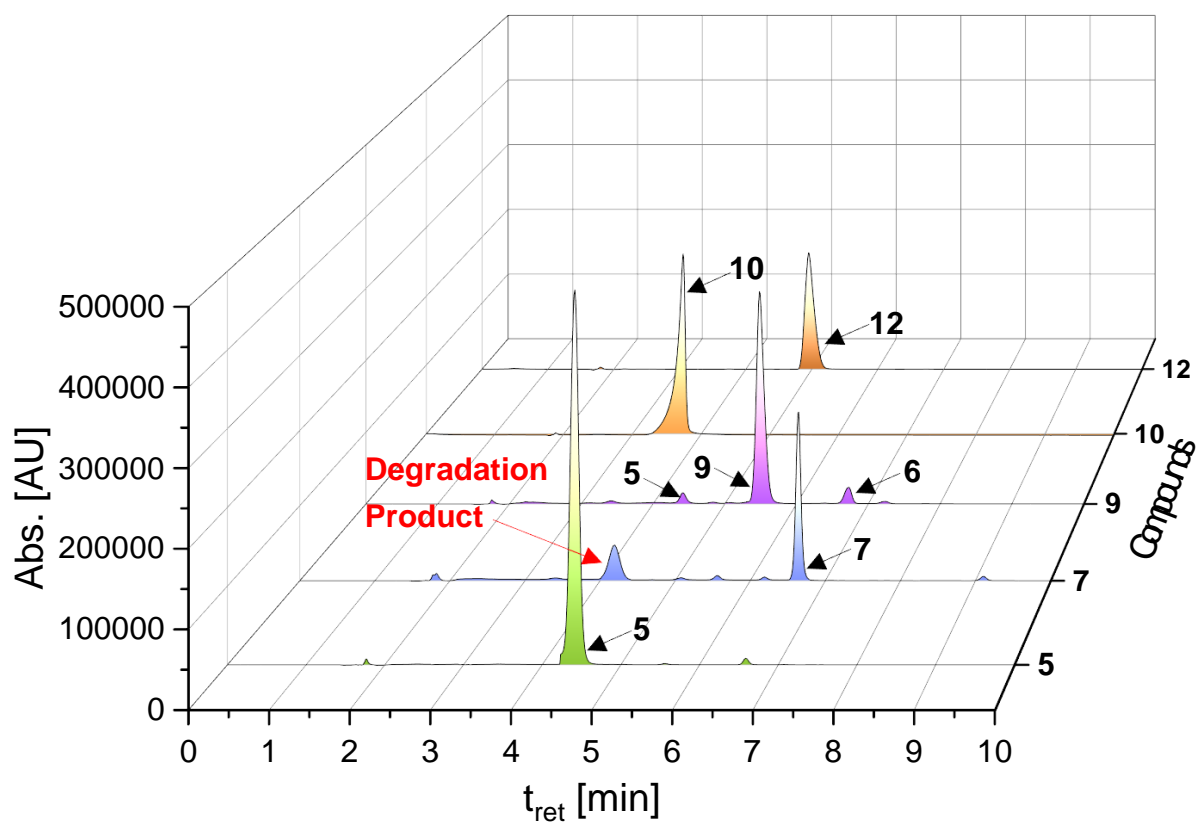

**Figure S36.** HPLC chromatograms of complexes **5**, **7**, **9**, **10**, and **12** in ACN at  $t = 72$  h. Complex concentration: 0.5 mM. Peaks **5** and **6** in the chromatogram of **9** come from synthesis (side products).

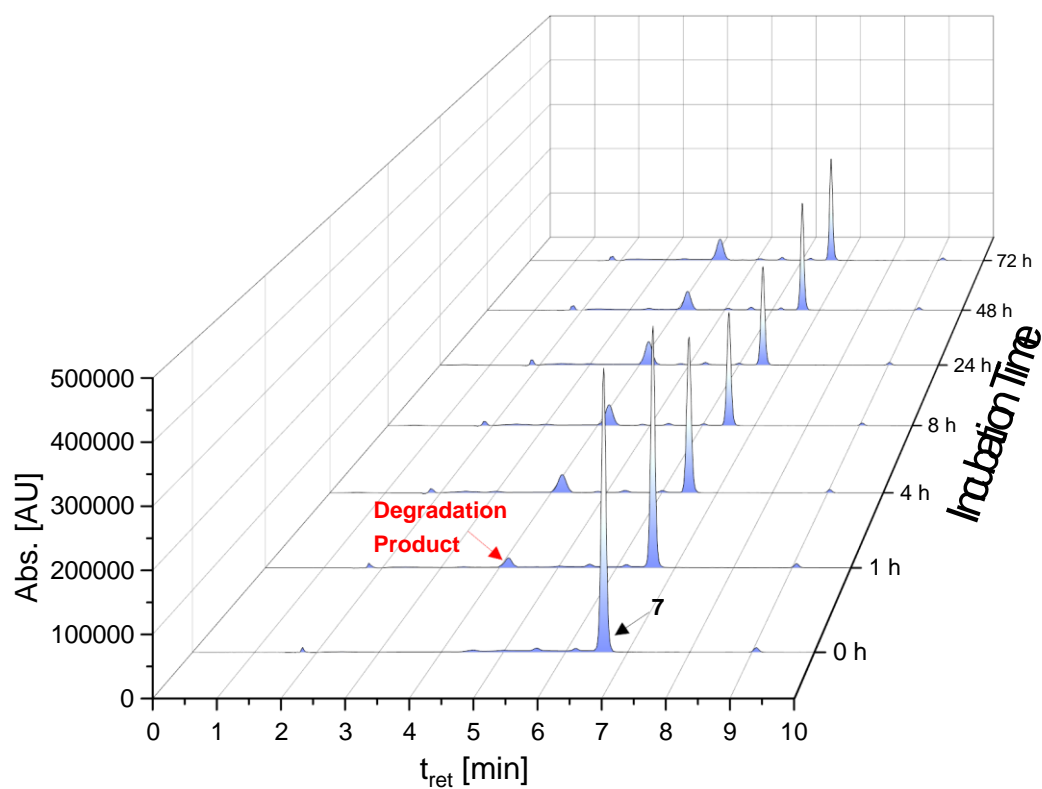

**Figure S37.** HPLC chromatograms of **7** incubated in ACN up to 72 h. Complex concentration: 0.5 mM.

## 8.2. Stability in RPMI 1640 cell culture medium (without FCS)

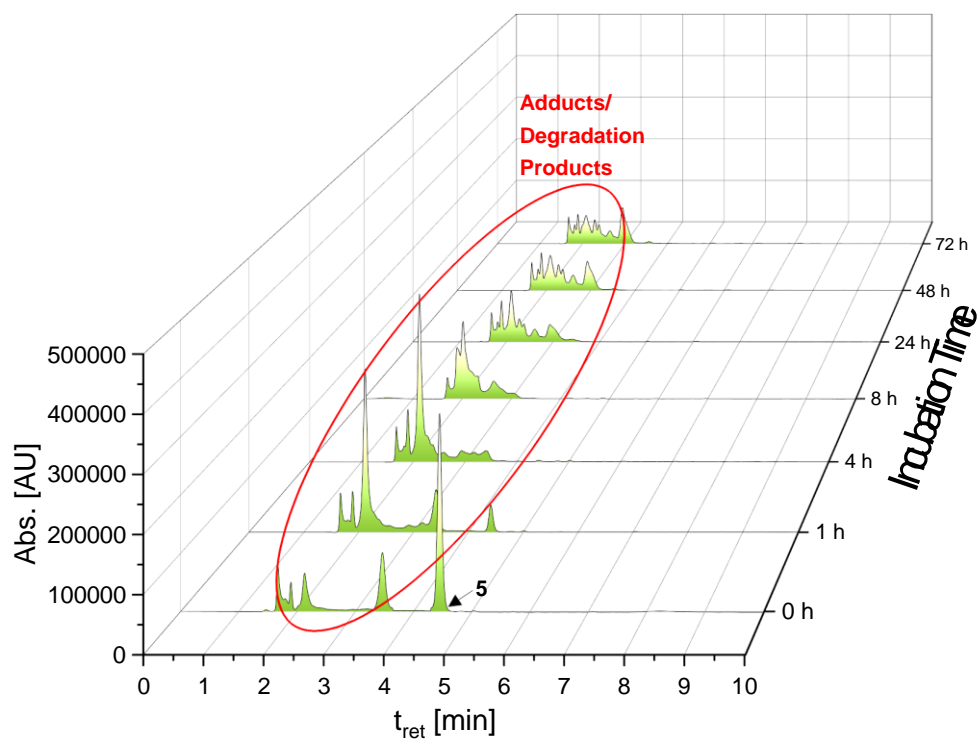

**Figure S38.** HPLC chromatograms of **5** over 72 h of incubation in ACN/RPMI 1640 (w/o FCS) = 50:50 (v/v). Complex concentration: 0.5 mM.

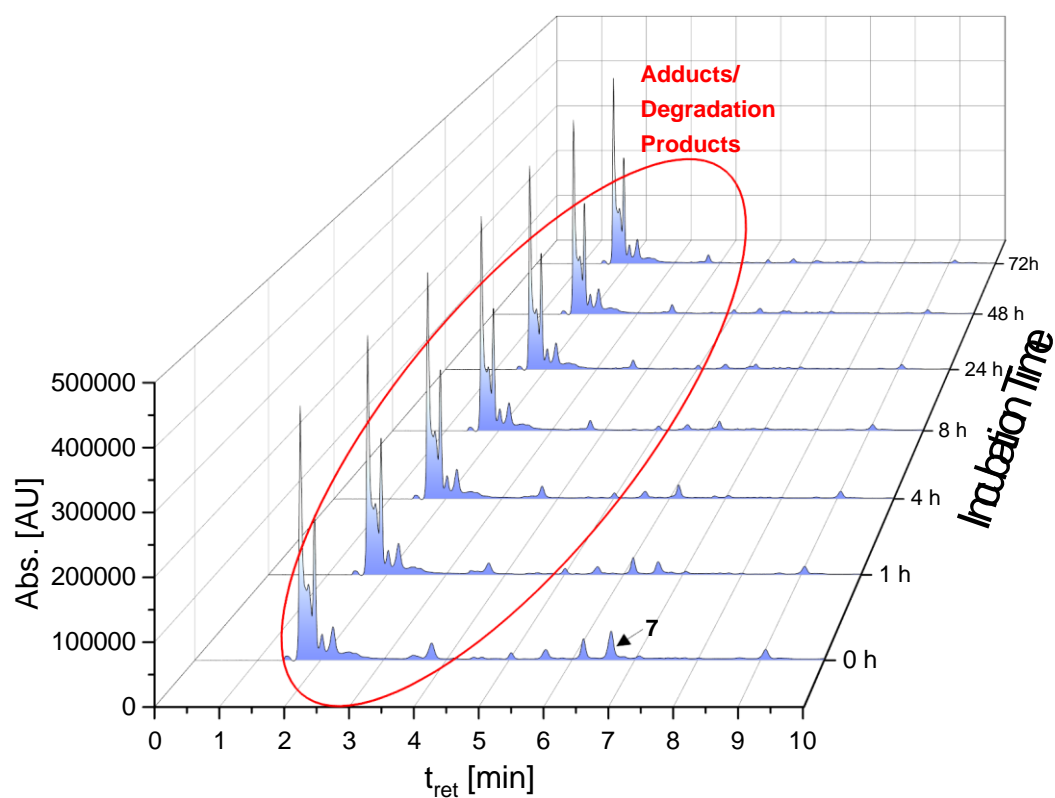

**Figure S39.** HPLC chromatograms of **7** over 72 h of incubation in ACN/RPMI 1640 (w/o FCS) = 50:50 (v/v). Complex concentration: 0.5 mM.

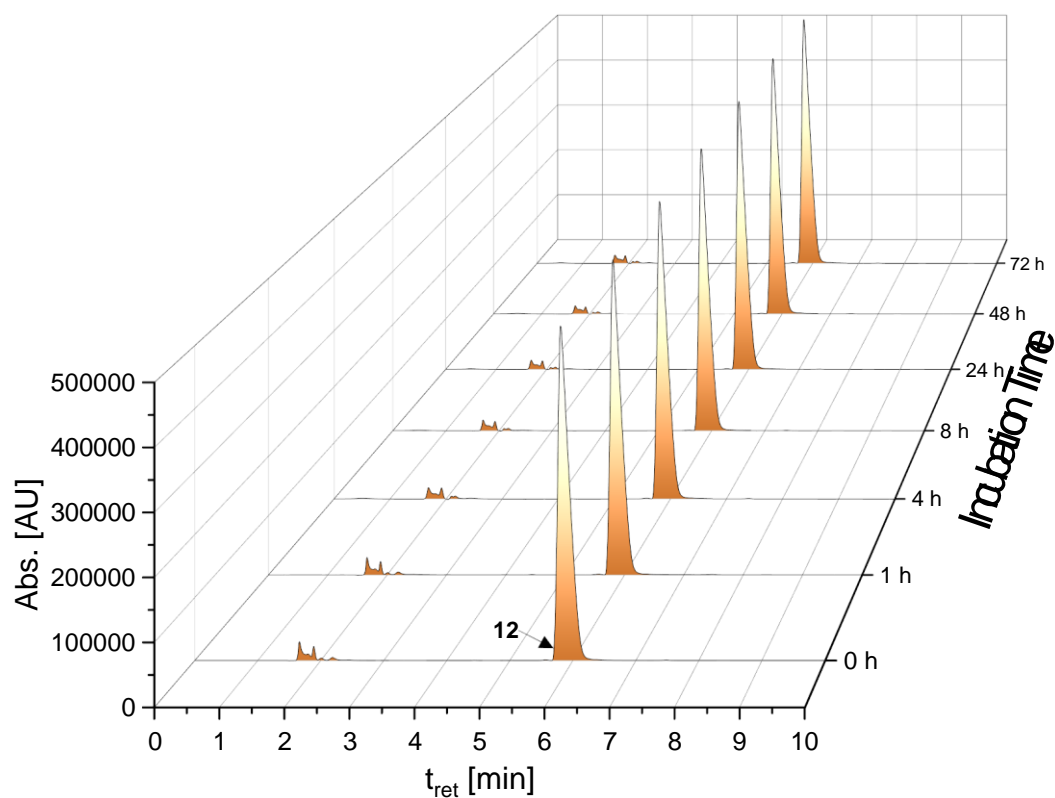

**Figure S40.** HPLC chromatograms of **12** over 72 h of incubation in ACN/RPMI 1640 (w/o FCS) = 50:50 (v/v). Complex concentration: 0.5 mM.

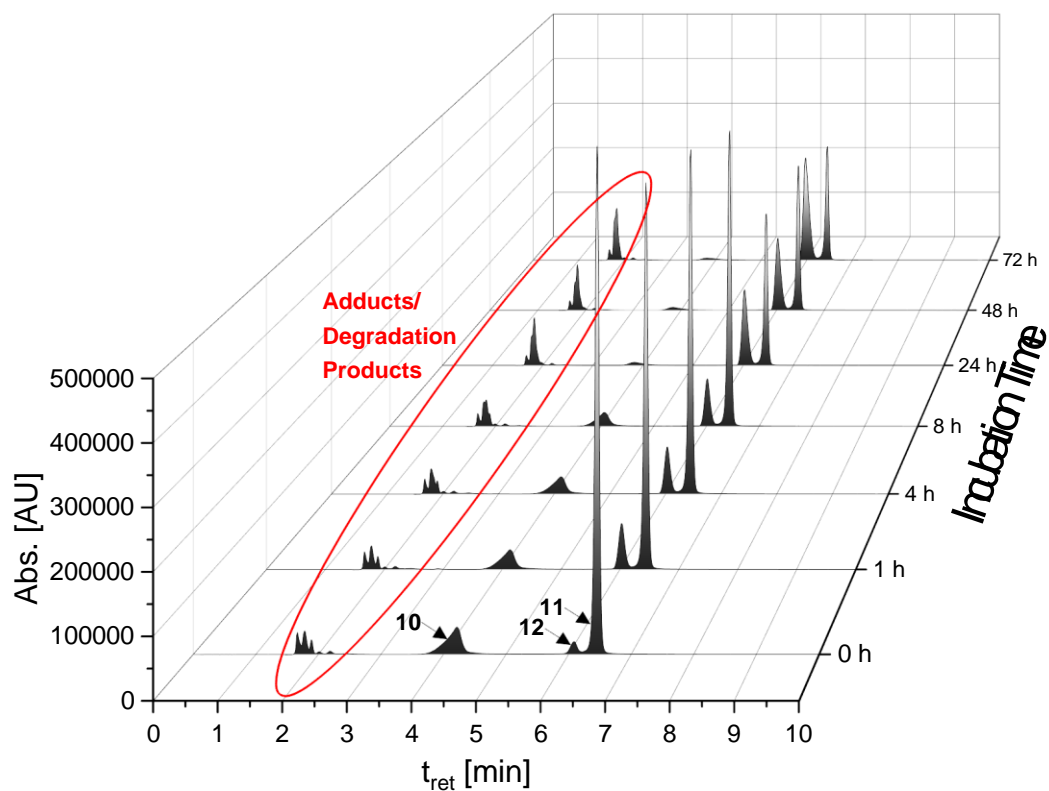

**Figure S41.** HPLC chromatograms of **11** over 72 h of incubation in ACN/RPMI 1640 (w/o FCS) = 50:50 (v/v). Complex concentration: 0.5 mM.

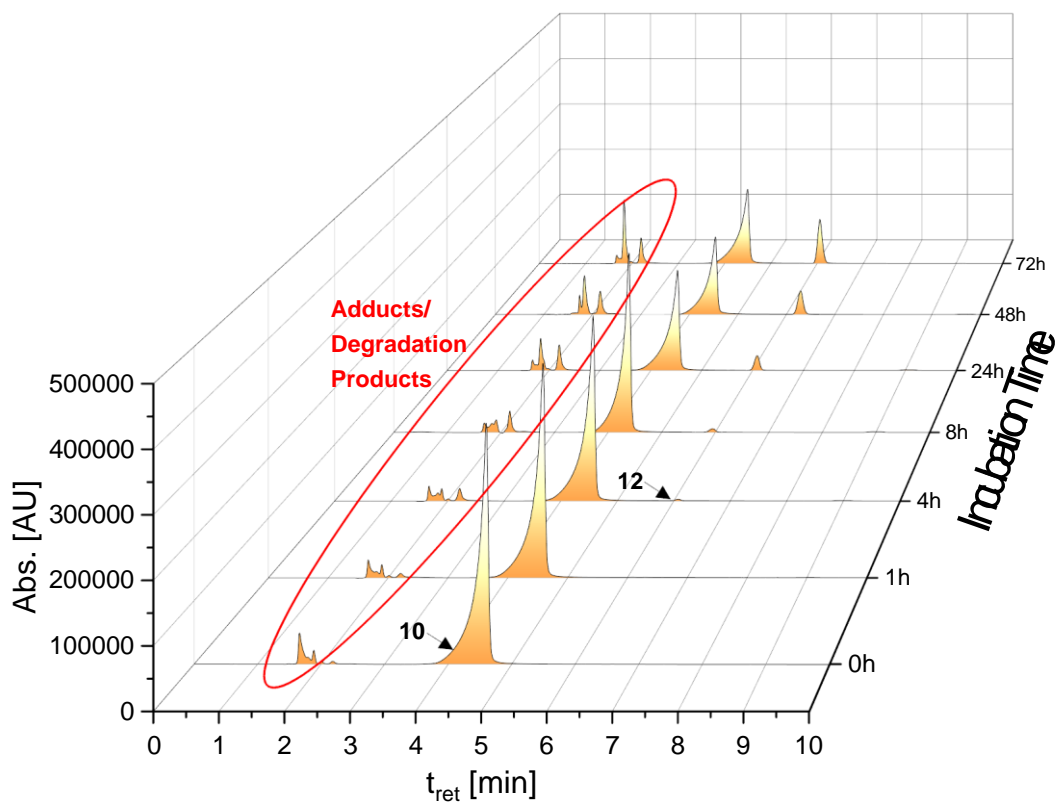

**Figure S42.** HPLC chromatograms of **10** over 72 h of incubation in ACN/RPMI 1640 (w/o FCS) = 50:50 (v/v). Complex concentration: 0.5 mM.

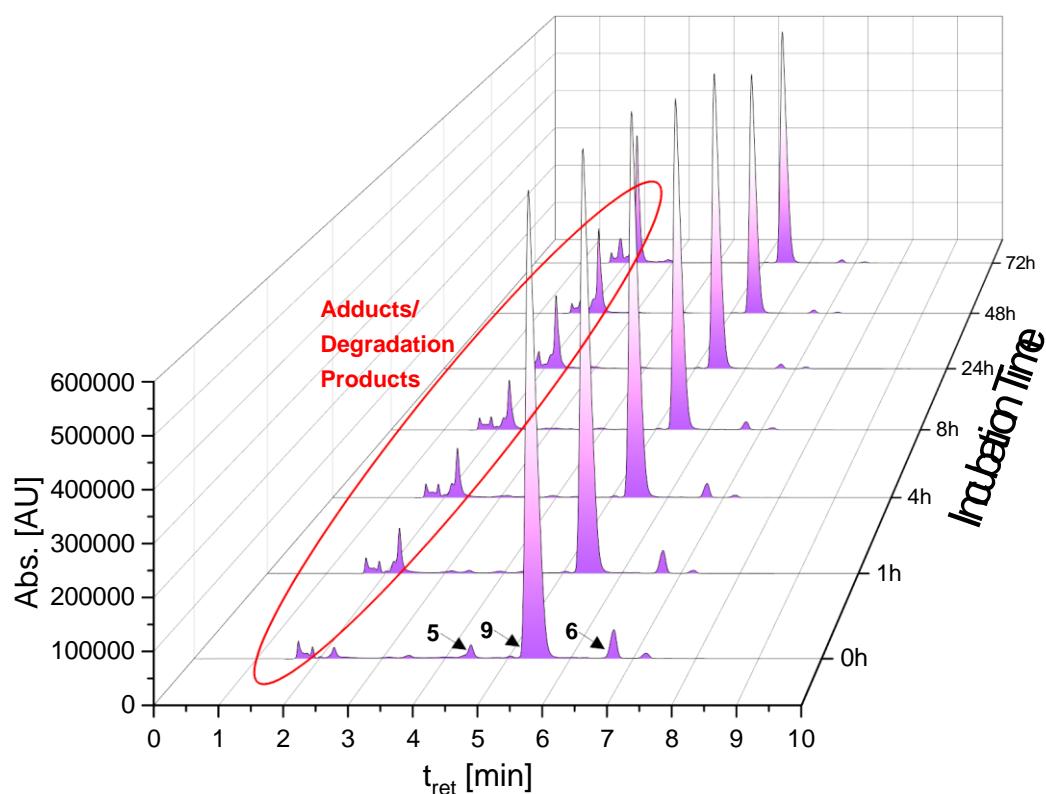

**Figure S43.** HPLC chromatograms of **9** over 72 h of incubation in ACN/RPMI 1640 (w/o FCS) = 50:50 (v/v). Complex concentration: 0.5 mM. Peaks **5** and **6** in the chromatograms of **9** come from synthesis (side products).

### 8.3. Interactions with Glutathione

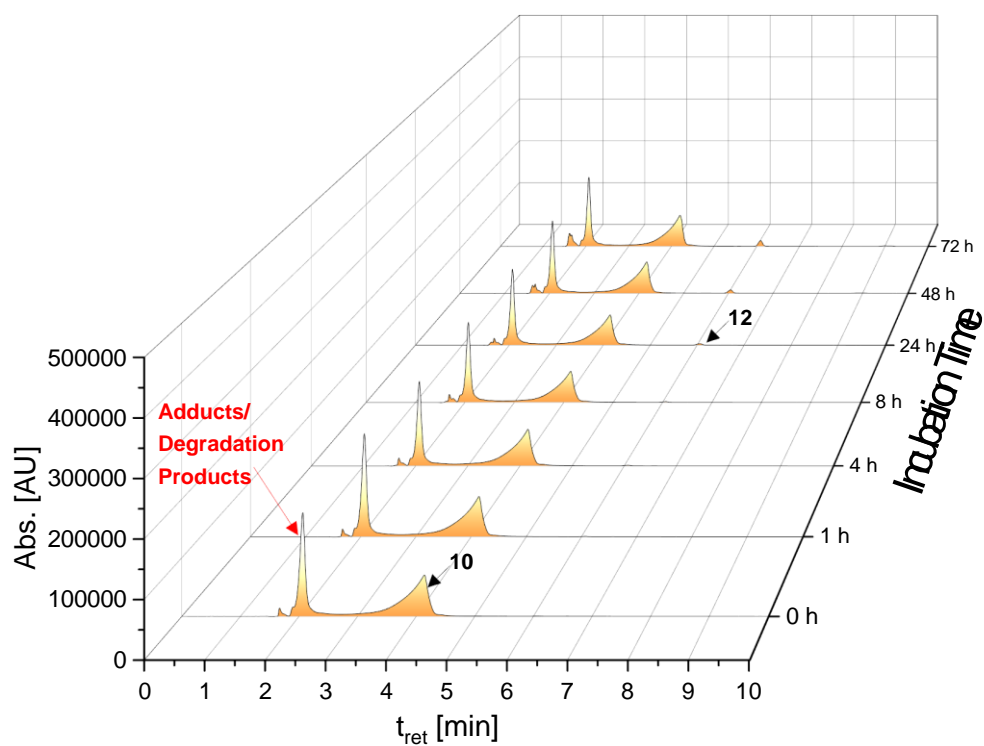

**Figure S44.** HPLC chromatograms up to 72 h of **10** dissolved in ACN/PBS = 50:50 (v/v) in presence of 5 equiv. GSH (red.). Complex concentration: 0.5 mM.

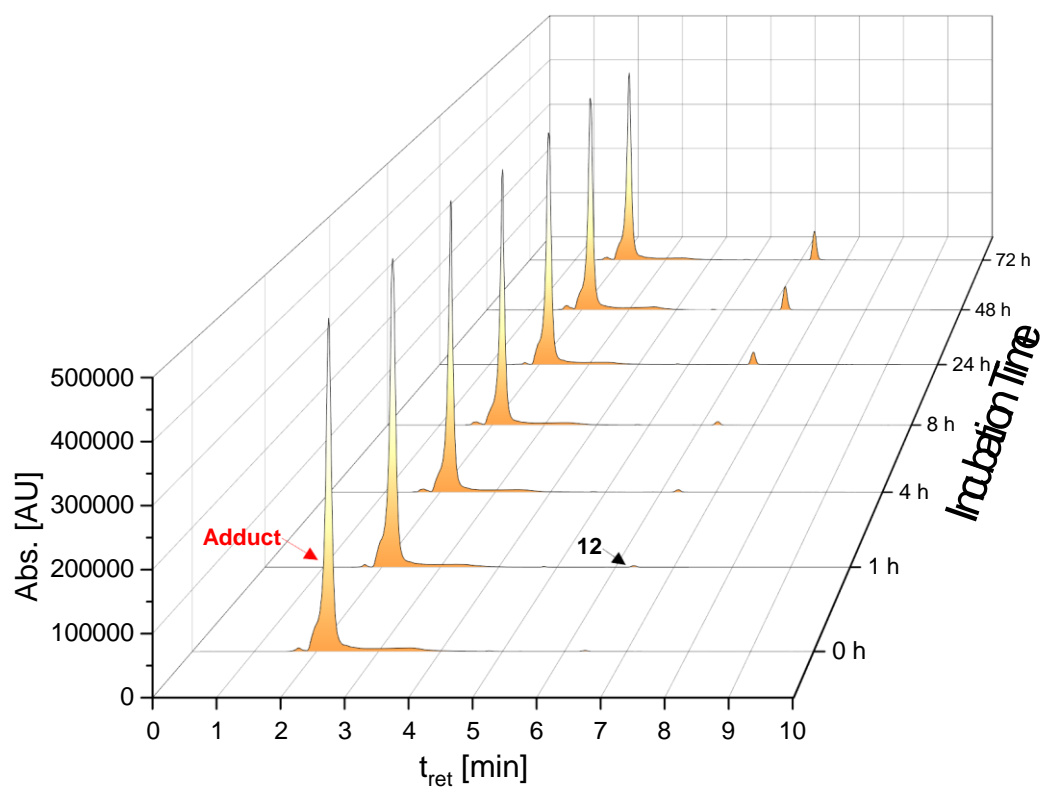

**Figure S45.** HPLC chromatograms up to 72 h of **10** dissolved in ACN/water = 50:50 (v/v) in presence of 5 equiv. GSH (red.). Complex concentration: 0.5 mM.

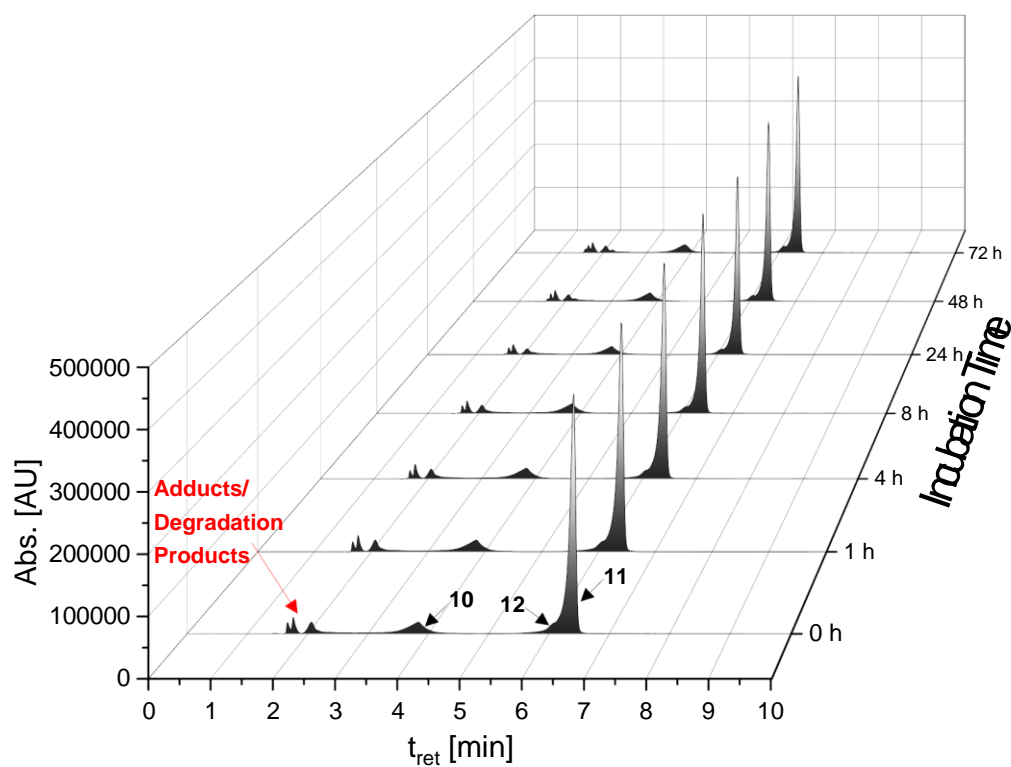

**Figure S46.** HPLC chromatograms up to 72 h of **11** dissolved in ACN/PBS = 50:50 (v/v) in presence of 5 equiv. GSH (red.). Complex concentration: 0.5 mM.

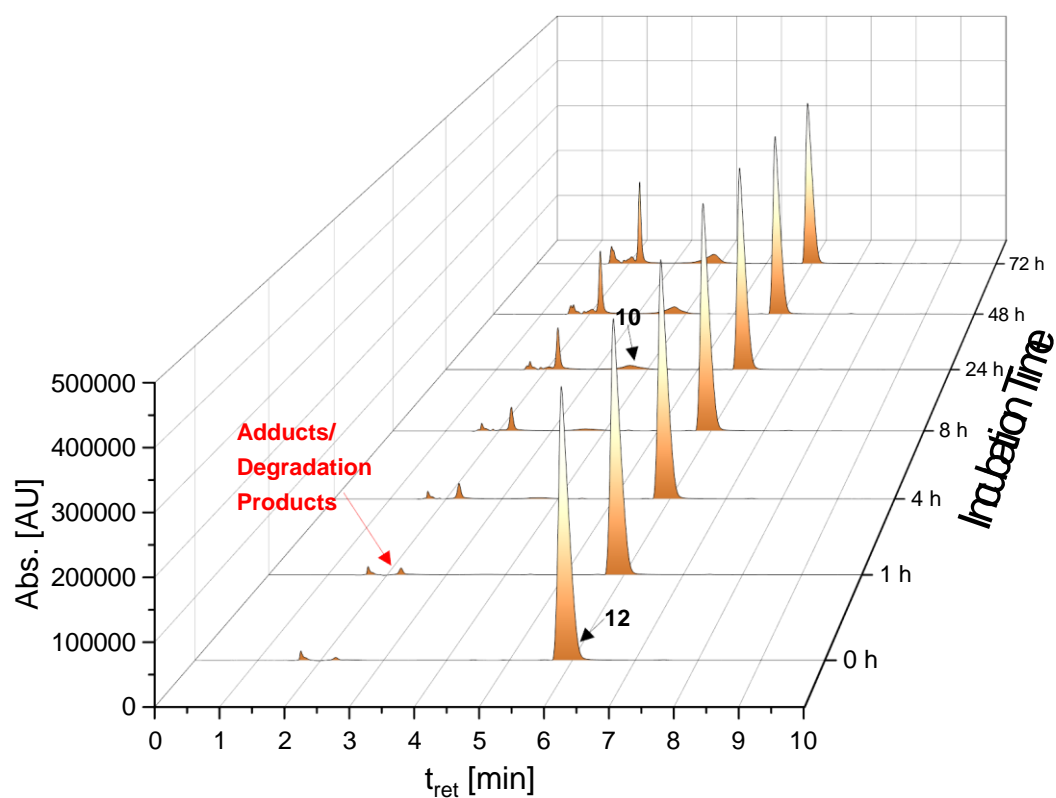

**Figure S47.** HPLC chromatograms up to 72 h of **12** dissolved in ACN/PBS = 50:50 (v/v) in presence of 5 equiv. GSH (red.). Complex concentration: 0.5 mM.

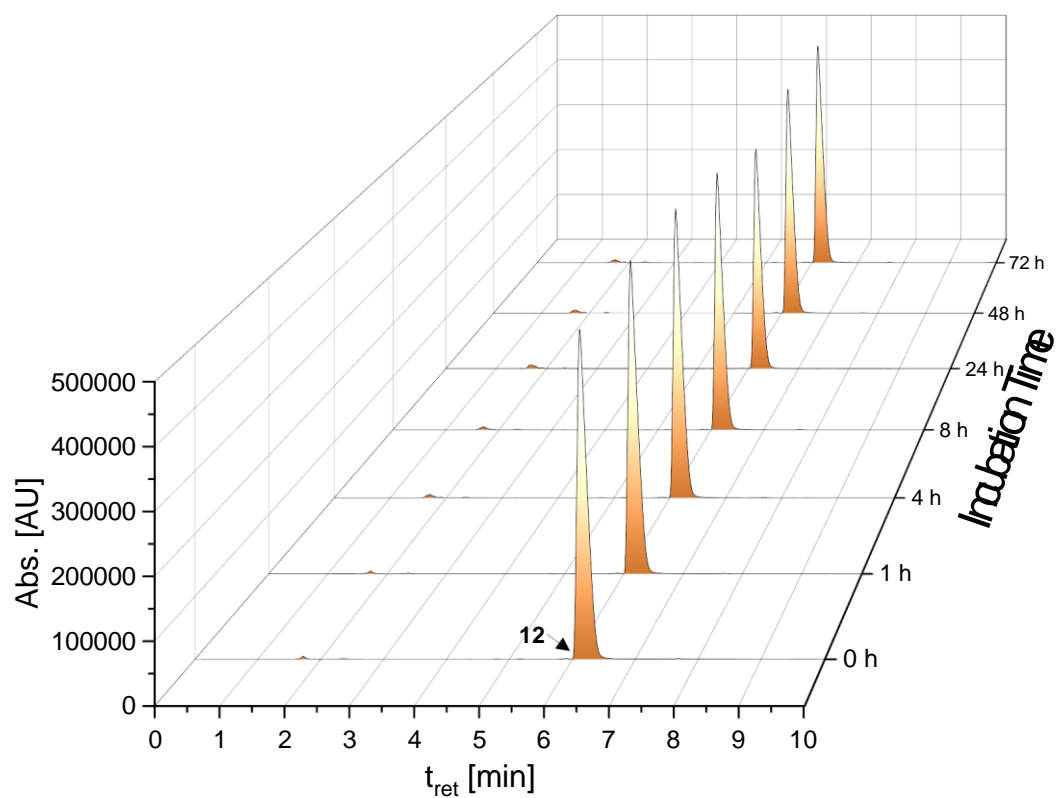

**Figure S48.** HPLC chromatograms up to 72 h of **12** dissolved in ACN/water = 50:50 (v/v) in presence of 5 equiv. GSH (red.). Complex concentration: 0.5 mM.

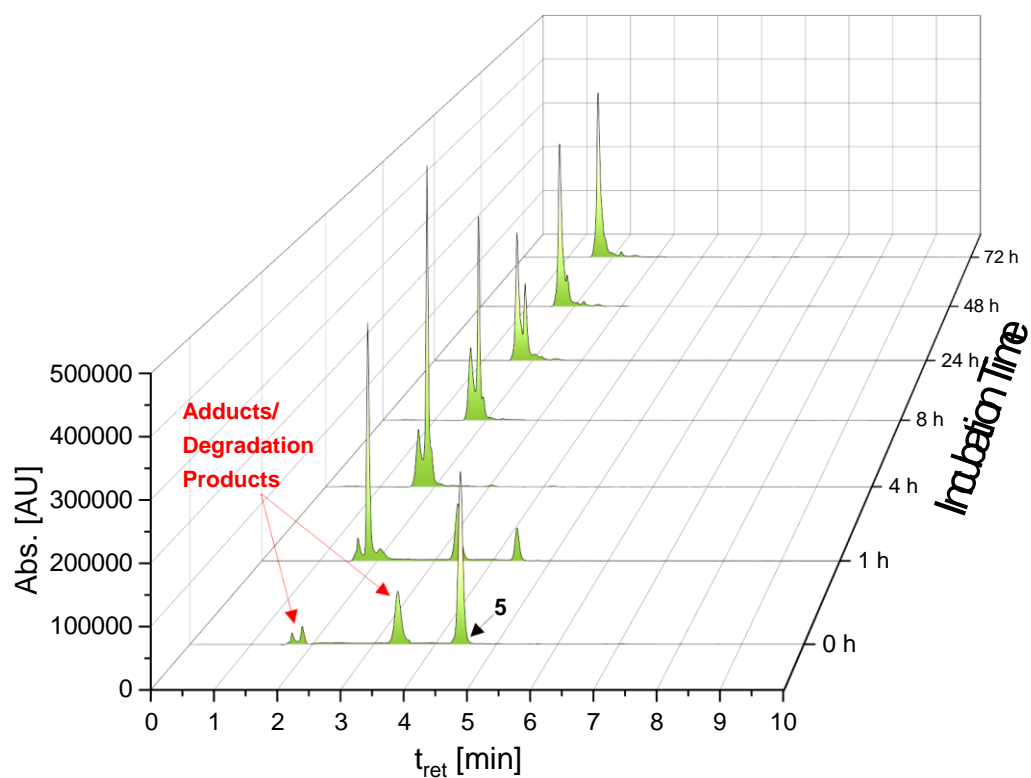

**Figure S49.** HPLC chromatograms up to 72 h of **5** dissolved in ACN/PBS = 50:50 (v/v) in presence of 5 equiv. GSH (red.). Complex concentration: 0.5 mM.

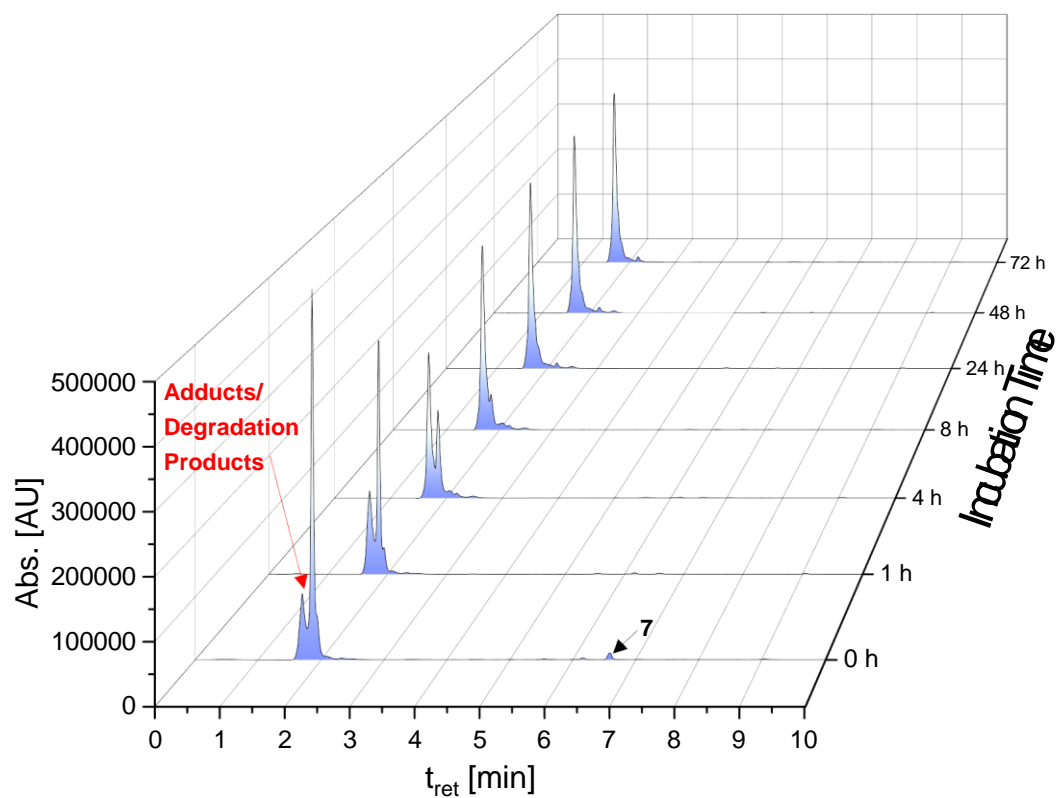

**Figure S50.** HPLC chromatograms up to 72 h of **7** dissolved in ACN/PBS = 50:50 (v/v) in presence of 5 equiv. GSH (red.). Complex concentration: 0.5 mM.

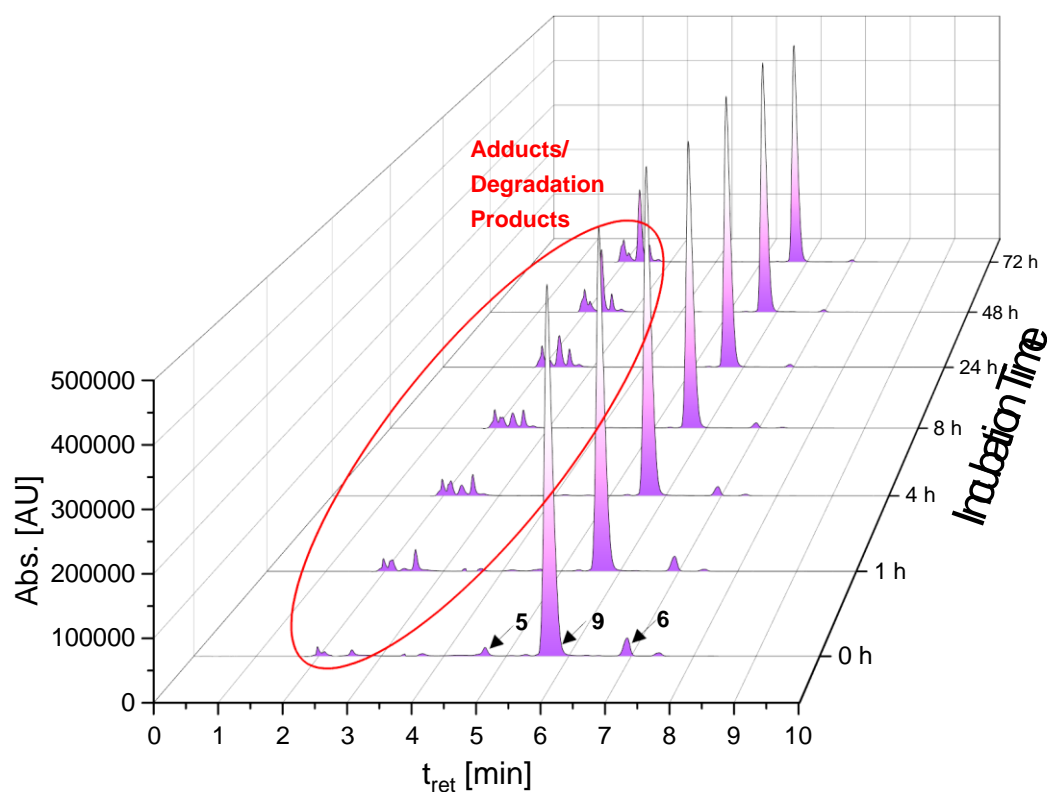

**Figure S51.** HPLC chromatograms up to 72 h of **9** dissolved in ACN/PBS = 50:50 (v/v) in presence of 5 equiv. GSH (red.). Complex concentration: 0.5 mM. Peaks **5** and **6** in the chromatograms of **9** come from synthesis (side products).

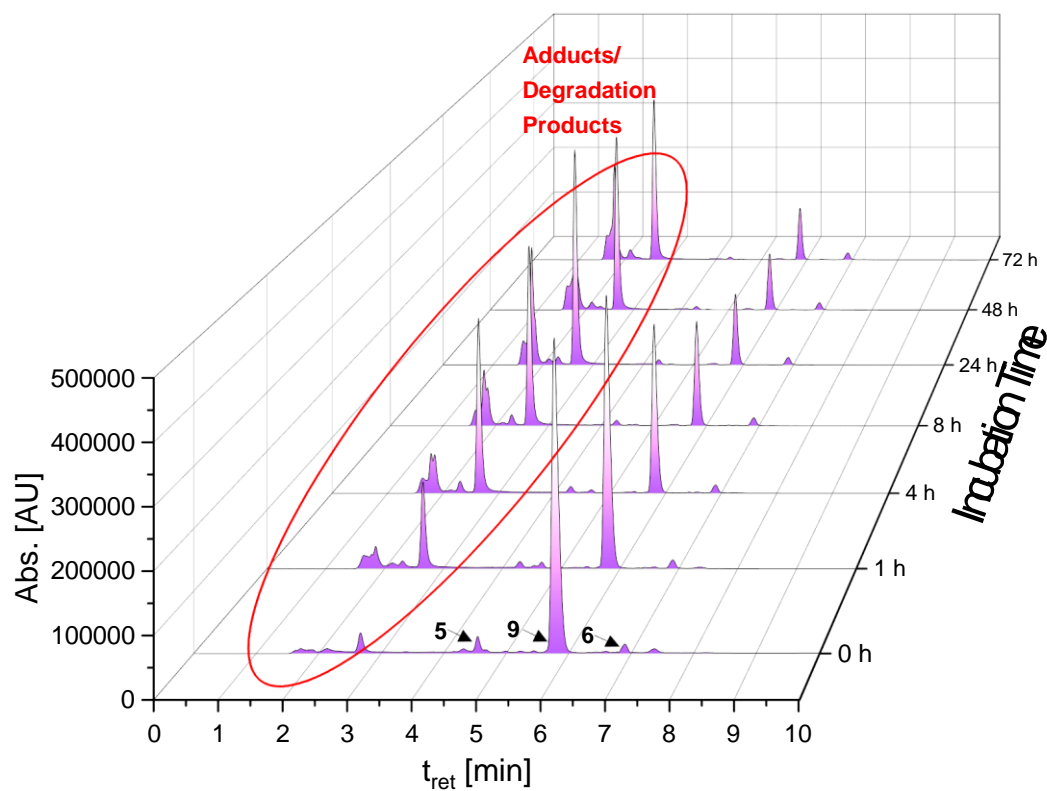

**Figure S52.** HPLC chromatograms up to 72 h of **9** dissolved in ACN/water = 50:50 (v/v) in presence of 5 equiv. GSH (red.). Complex concentration: 0.5 mM. Peaks **5** and **6** in the chromatograms of **9** come from synthesis (side products).

#### 8.4. Interactions with 5'-GMP

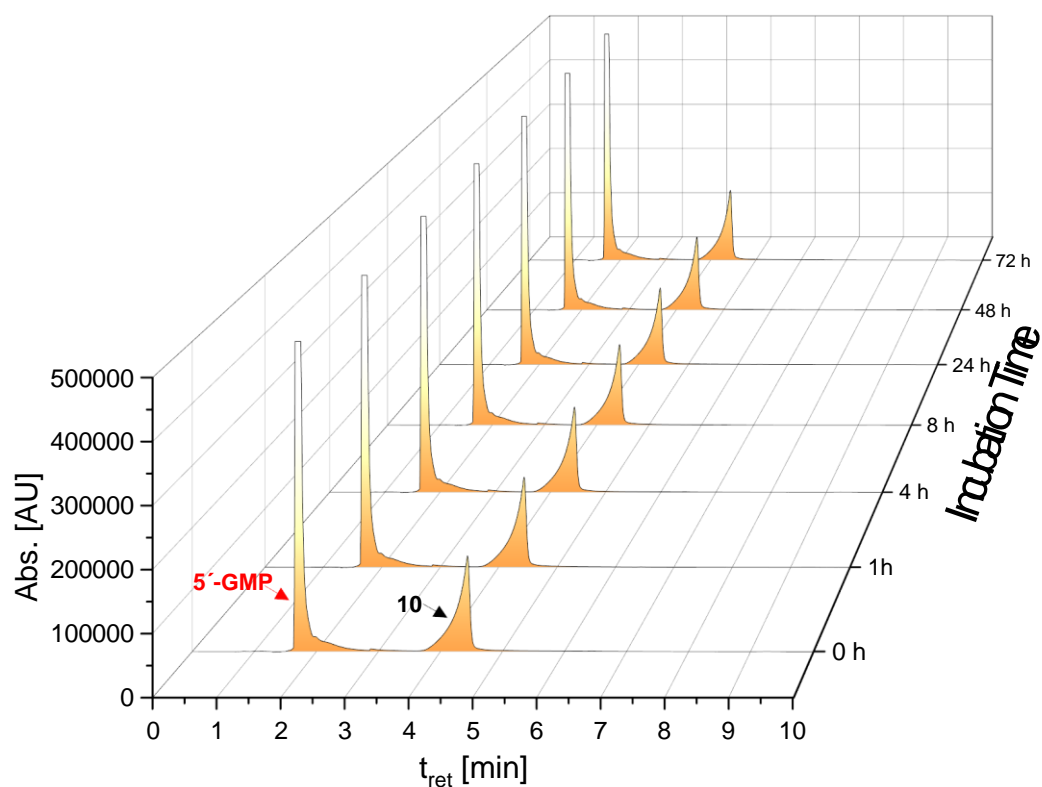

**Figure S53.** HPLC chromatograms up to 72 h of **10** dissolved in ACN/PBS = 50:50 (v/v) in presence of 5 equiv. 5'-GMP (at pH 7.4). Complex concentration: 0.5 mM. The 5'-GMP peak ( $t_{\text{ret}}$  = 1.82 min) was cut > 500.000 AU.

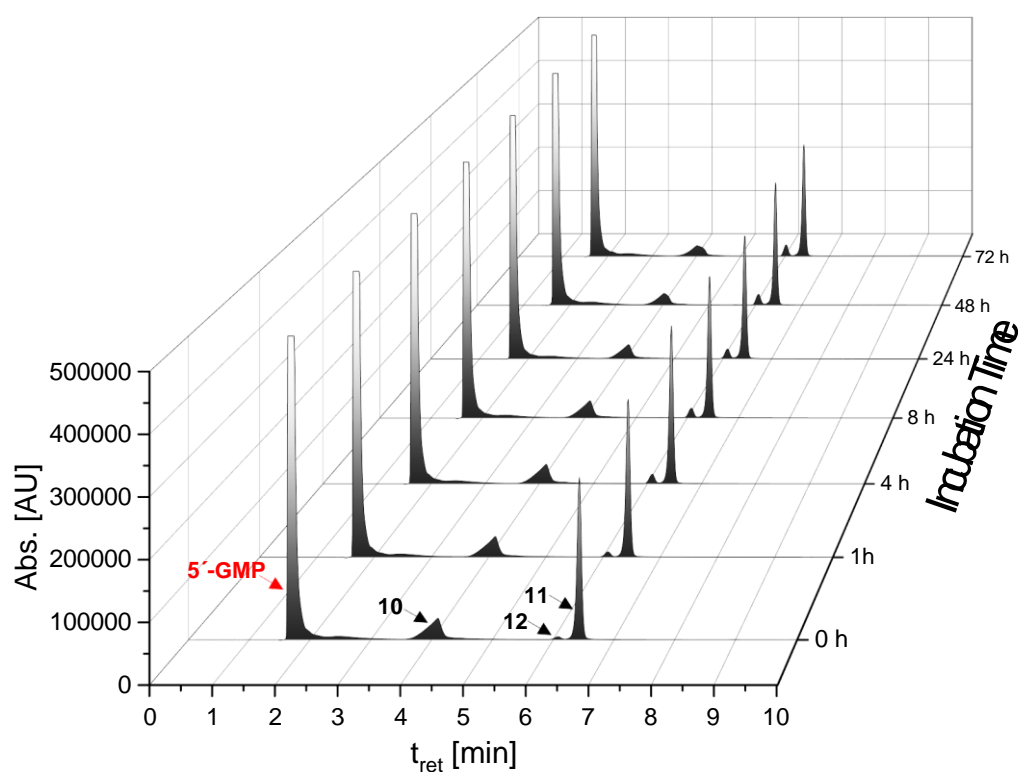

**Figure S54.** HPLC chromatograms up to 72 h of **11** dissolved in ACN/PBS = 50:50 (v/v) in presence of 5 equiv. 5'-GMP (at pH 7.4). Complex concentration: 0.5 mM. The 5'-GMP peak ( $t_{\text{ret}}$  = 1.82 min) was cut > 500.000 AU.

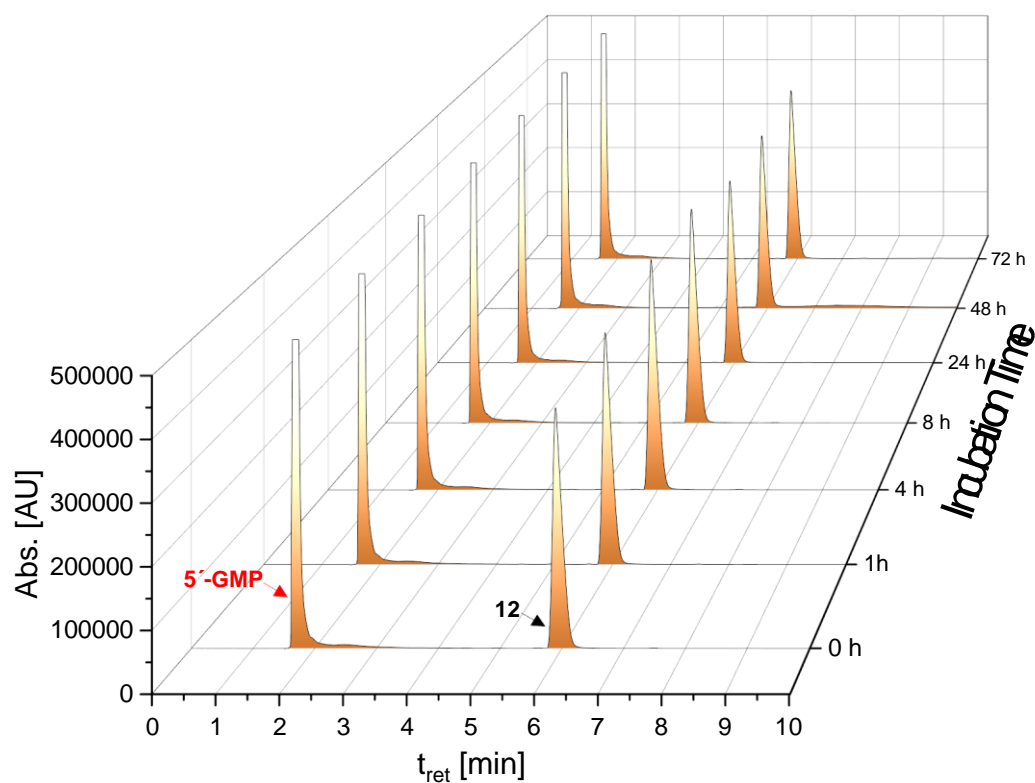

**Figure S55.** HPLC chromatograms up to 72 h of **12** dissolved in ACN/PBS = 50:50 (v/v) in presence of 5 equiv. 5'-GMP (at pH 7.4). Complex concentration: 0.5 mM. The 5'-GMP peak ( $t_{ret} = 1.82$  min) was cut > 500.000 AU.

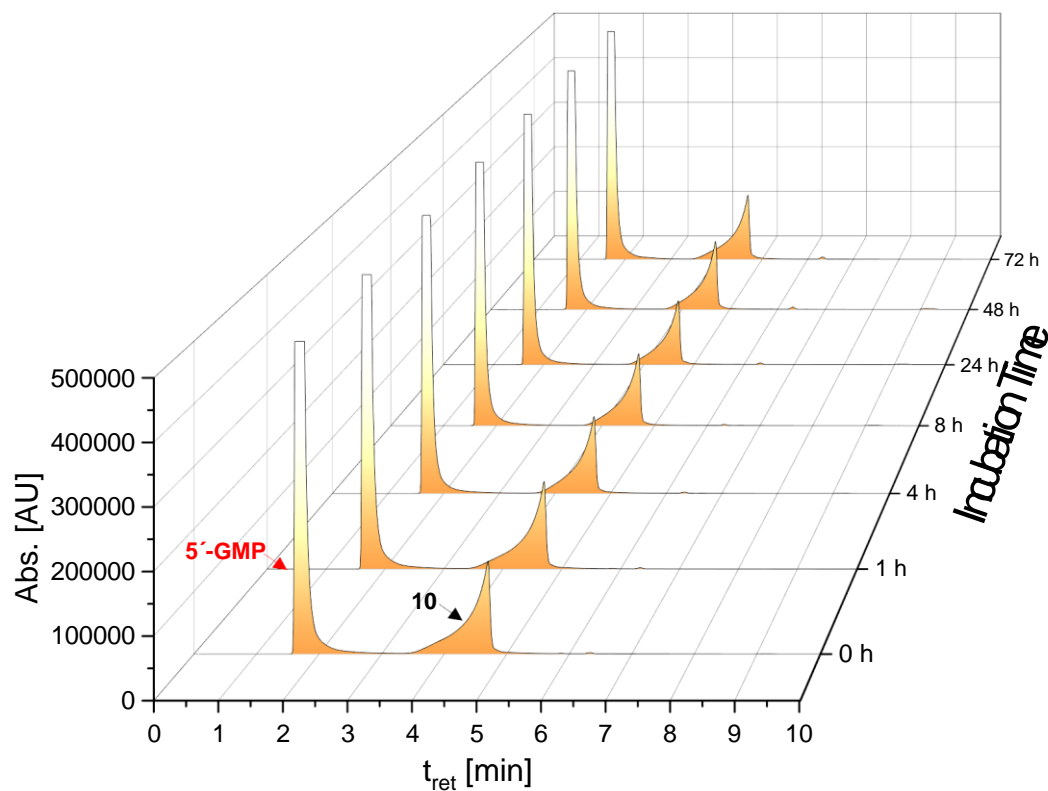

**Figure S56.** HPLC chromatograms up to 72 h of **10** dissolved in ACN/water = 50:50 (v/v) in presence of 5 equiv. 5'-GMP (at pH 7.4). Complex concentration: 0.5 mM. The 5'-GMP peak ( $t_{ret} = 1.82$  min) was cut > 500.000 AU.

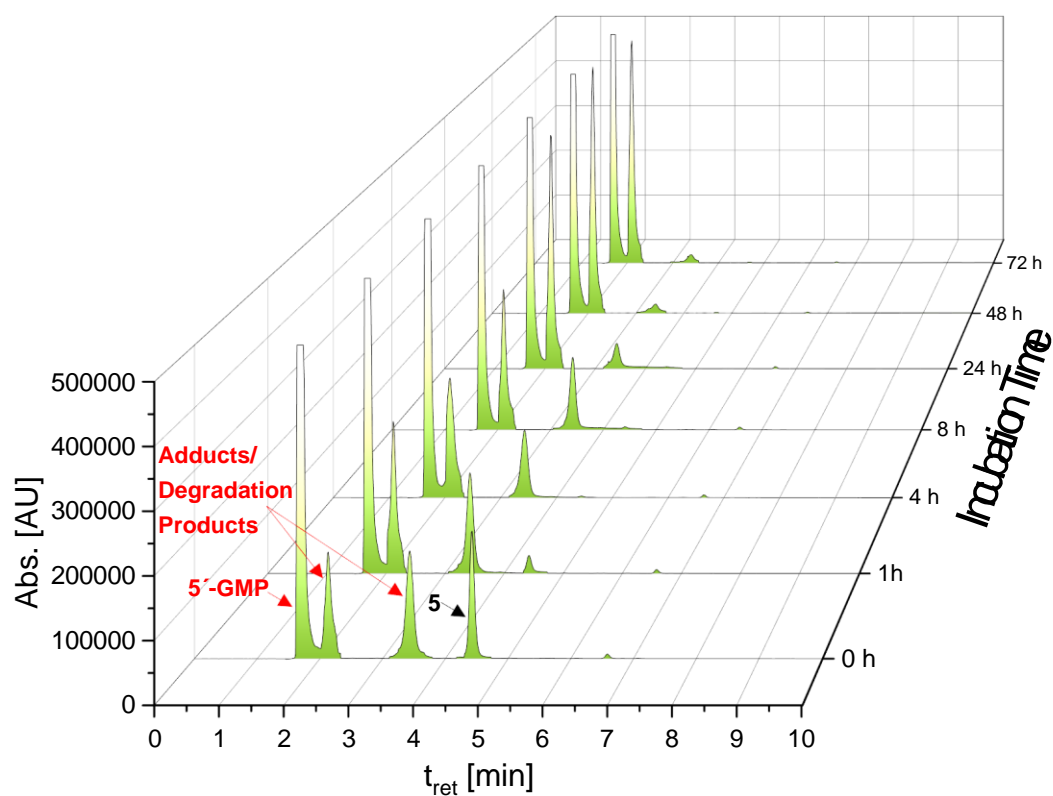

**Figure S57.** HPLC chromatograms up to 72 h of **5** dissolved in ACN/PBS = 50:50 (v/v) in presence of 5 equiv. **5'**-GMP (at pH 7.4). Complex concentration: 0.5 mM. The **5'**-GMP peak ( $t_{\text{ret}}$  = 1.82 min) was cut > 500.000 AU.

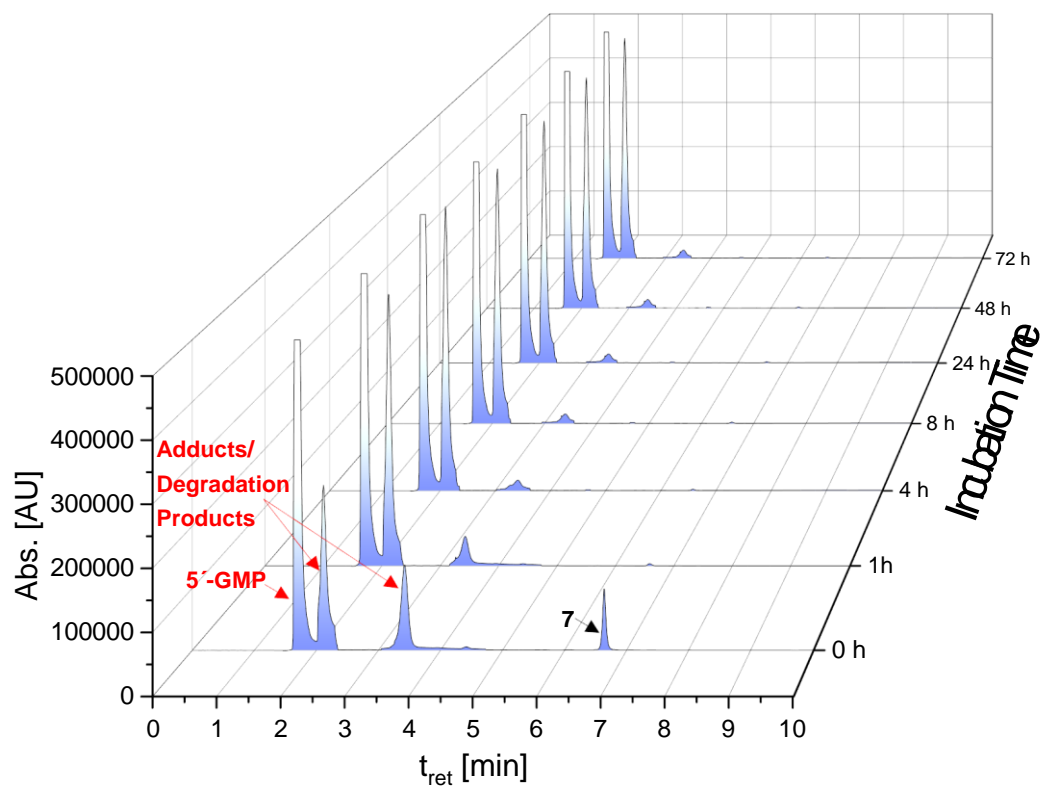

**Figure S58.** HPLC chromatograms up to 72 h of **7** dissolved in ACN/PBS = 50:50 (v/v) in presence of 5 equiv. **5'**-GMP (at pH 7.4). Complex concentration: 0.5 mM. The **5'**-GMP peak ( $t_{\text{ret}}$  = 1.82 min) was cut > 500.000 AU.

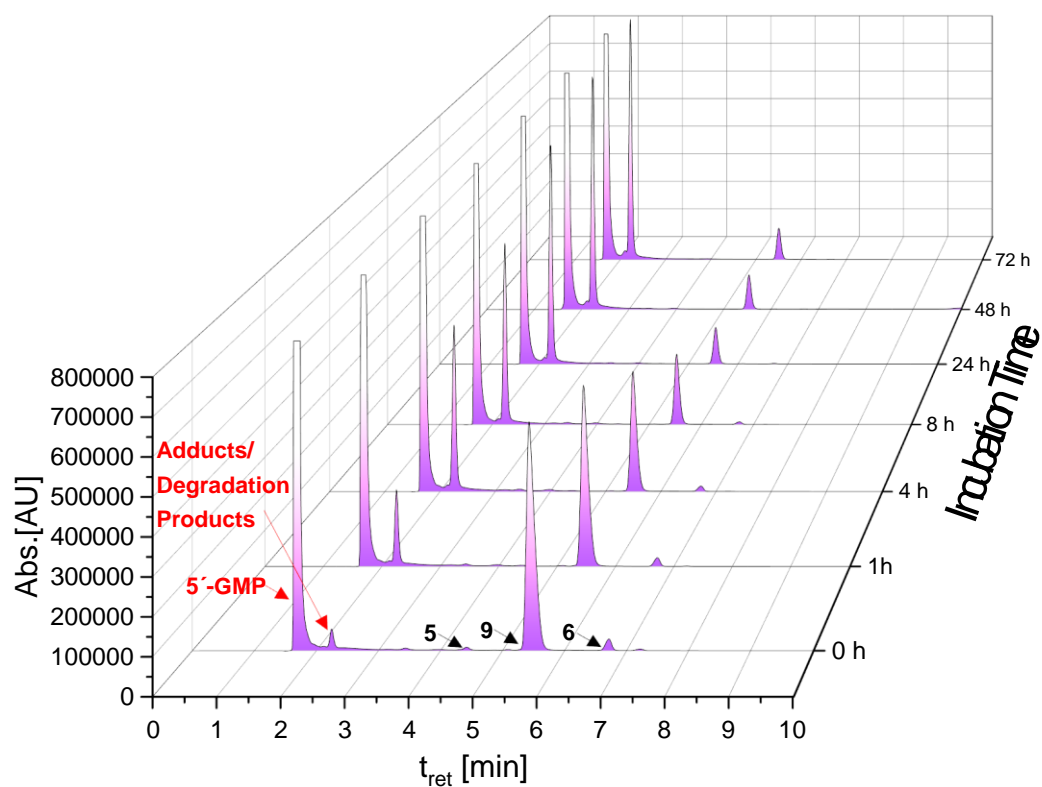

**Figure S59.** HPLC chromatograms up to 72 h of **9** dissolved in ACN/PBS = 50:50 (v/v) in presence of 5 equiv. 5'-GMP (at pH 7.4). Complex concentration: 0.5 mM. The 5'-GMP peak ( $t_{ret} = 1.82$  min) was cut > 800.000 AU. Peaks **5** and **6** in the chromatograms of **9** come from synthesis (side products).

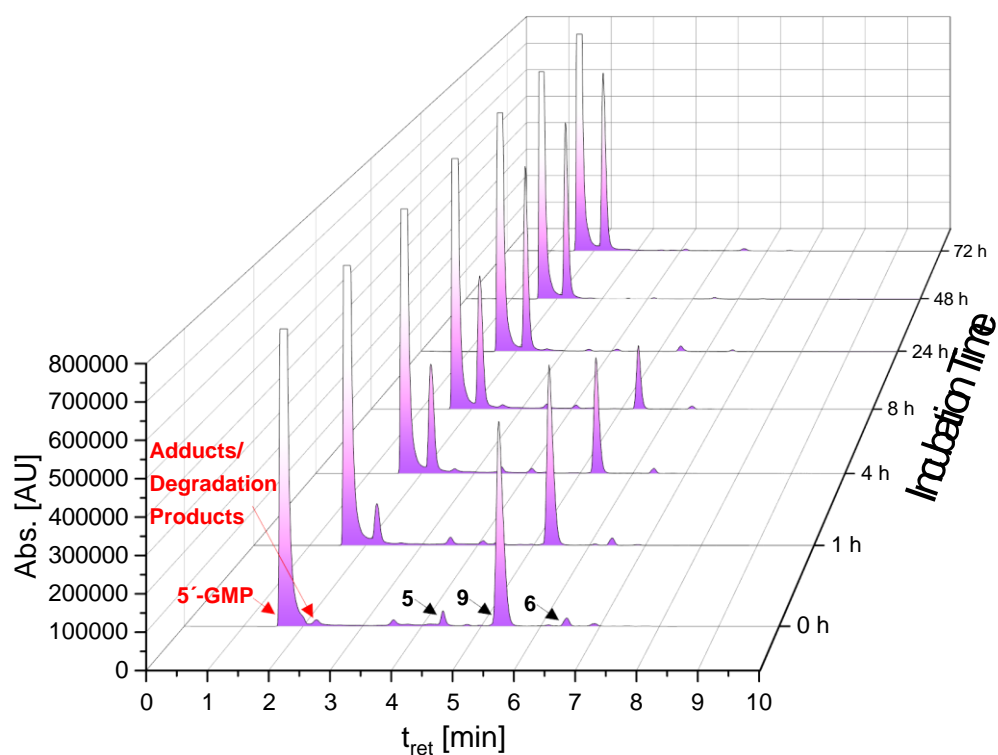

**Figure S60.** HPLC chromatograms up to 72 h of **9** dissolved in ACN/water = 50:50 (v/v) in presence of 5 equiv. 5'-GMP (at pH 7.4). Complex concentration: 0.5 mM. The 5'-GMP peak ( $t_{ret} = 1.82$  min) was cut > 800.000 AU. Peaks **5** and **6** in the chromatograms of **9** come from synthesis (side products).

## 8.5. Interactions with 5'-GMP in the presence of GSH (competitive experiment)

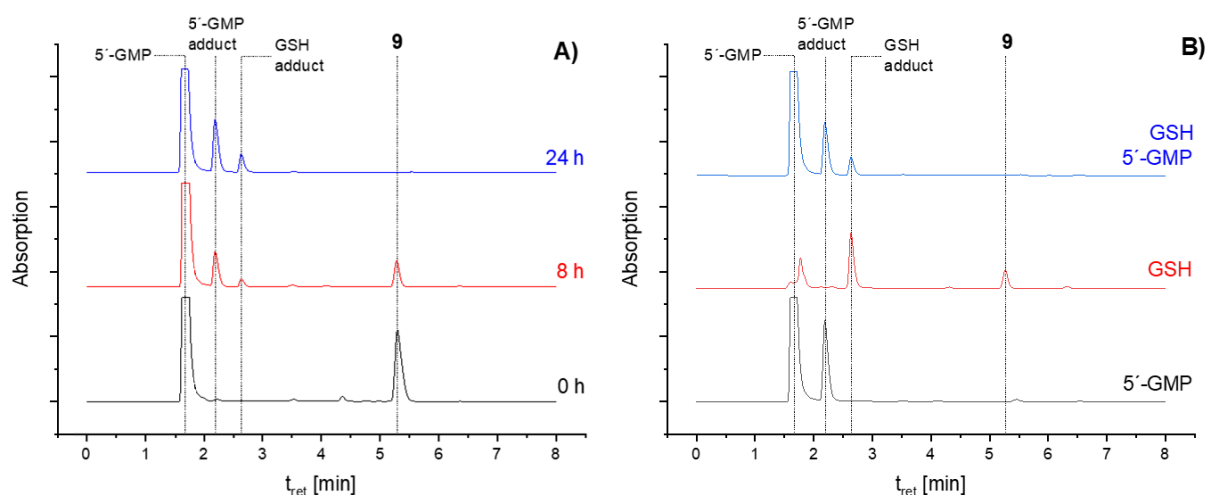

**Figure S61.** HPLC chromatograms of **9** in ACN/water = 50:50 (v/v) co-incubated with: A) 5'-GMP and GSH (both 5 equiv.) at 0, 8, and 24 h; B) 5'-GMP (5 equiv.), GSH (5 equiv.), or 5'-GMP and GSH (both 5 equiv.) at  $t = 24$  h. After 24 h of co-incubation of **9** with 5'-GMP and GSH (both 5 equiv.), the entire amount of complex **9** was transformed into GMP- and GSH-adducts in a ratio of 64:36 according to the HPLC chromatogram recorded at 254 nm.

## 9. Concentration-Effect Curves of **5**, **7**, **9**, and **10-12**

The concentration-effect curves were displayed with GraphPad Prism 8.0 (GraphPad Software, Boston, MA, USA).

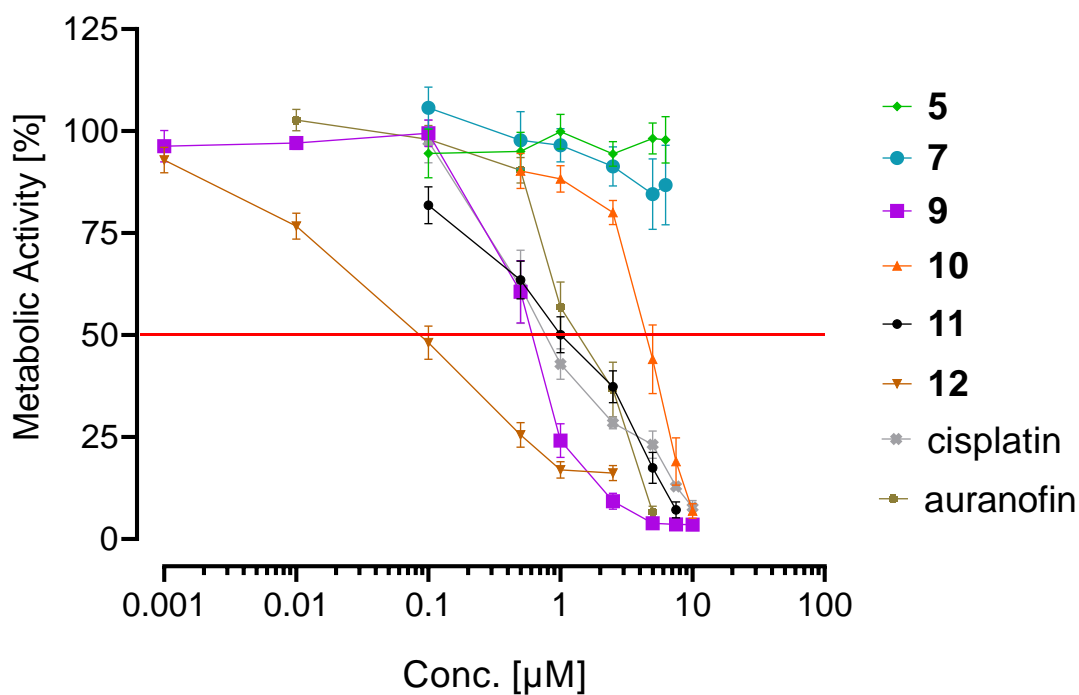

**Figure S62.** Concentration-effect curves of **5**, **7**, **9-12**, cisplatin, and auranofin in A2780wt cells. (exposure time: 72 h,  $n = 6 \pm \text{SEM}$ )

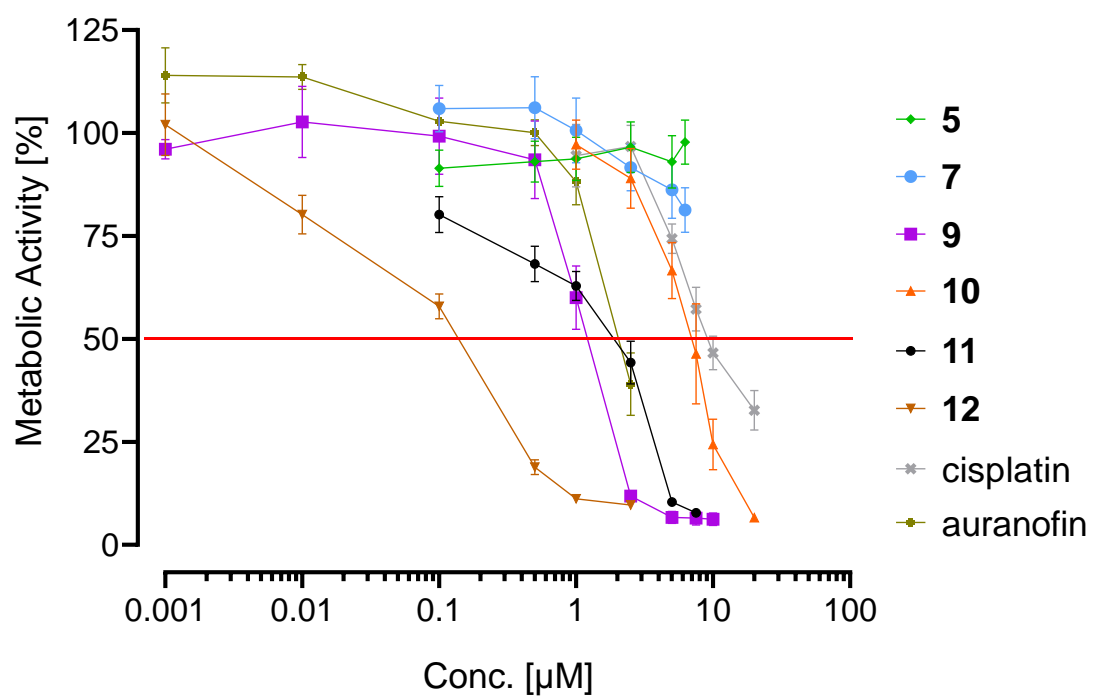

**Figure S63.** Concentration-effect curves of **5**, **7**, **9-12**, cisplatin, and auranofin in A2780cis cells (exposure time: 72 h,  $n = 6 \pm \text{SEM}$ )
